# Supplementary material for: Comprehensive identification of sphingolipid species by in silico retention time and tandem mass spectral library
Source: PubMed Central journal article supplement (PMC5352698; doi:10.1186/s13321-017-0205-3), 2017-03-15

Ceramide [NS] (d18:1/26:0);  $[M+CH_3COOH-H]^-$

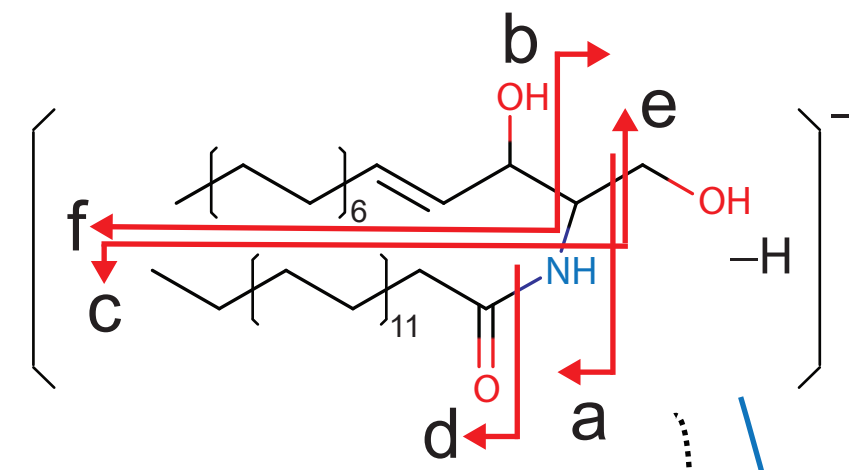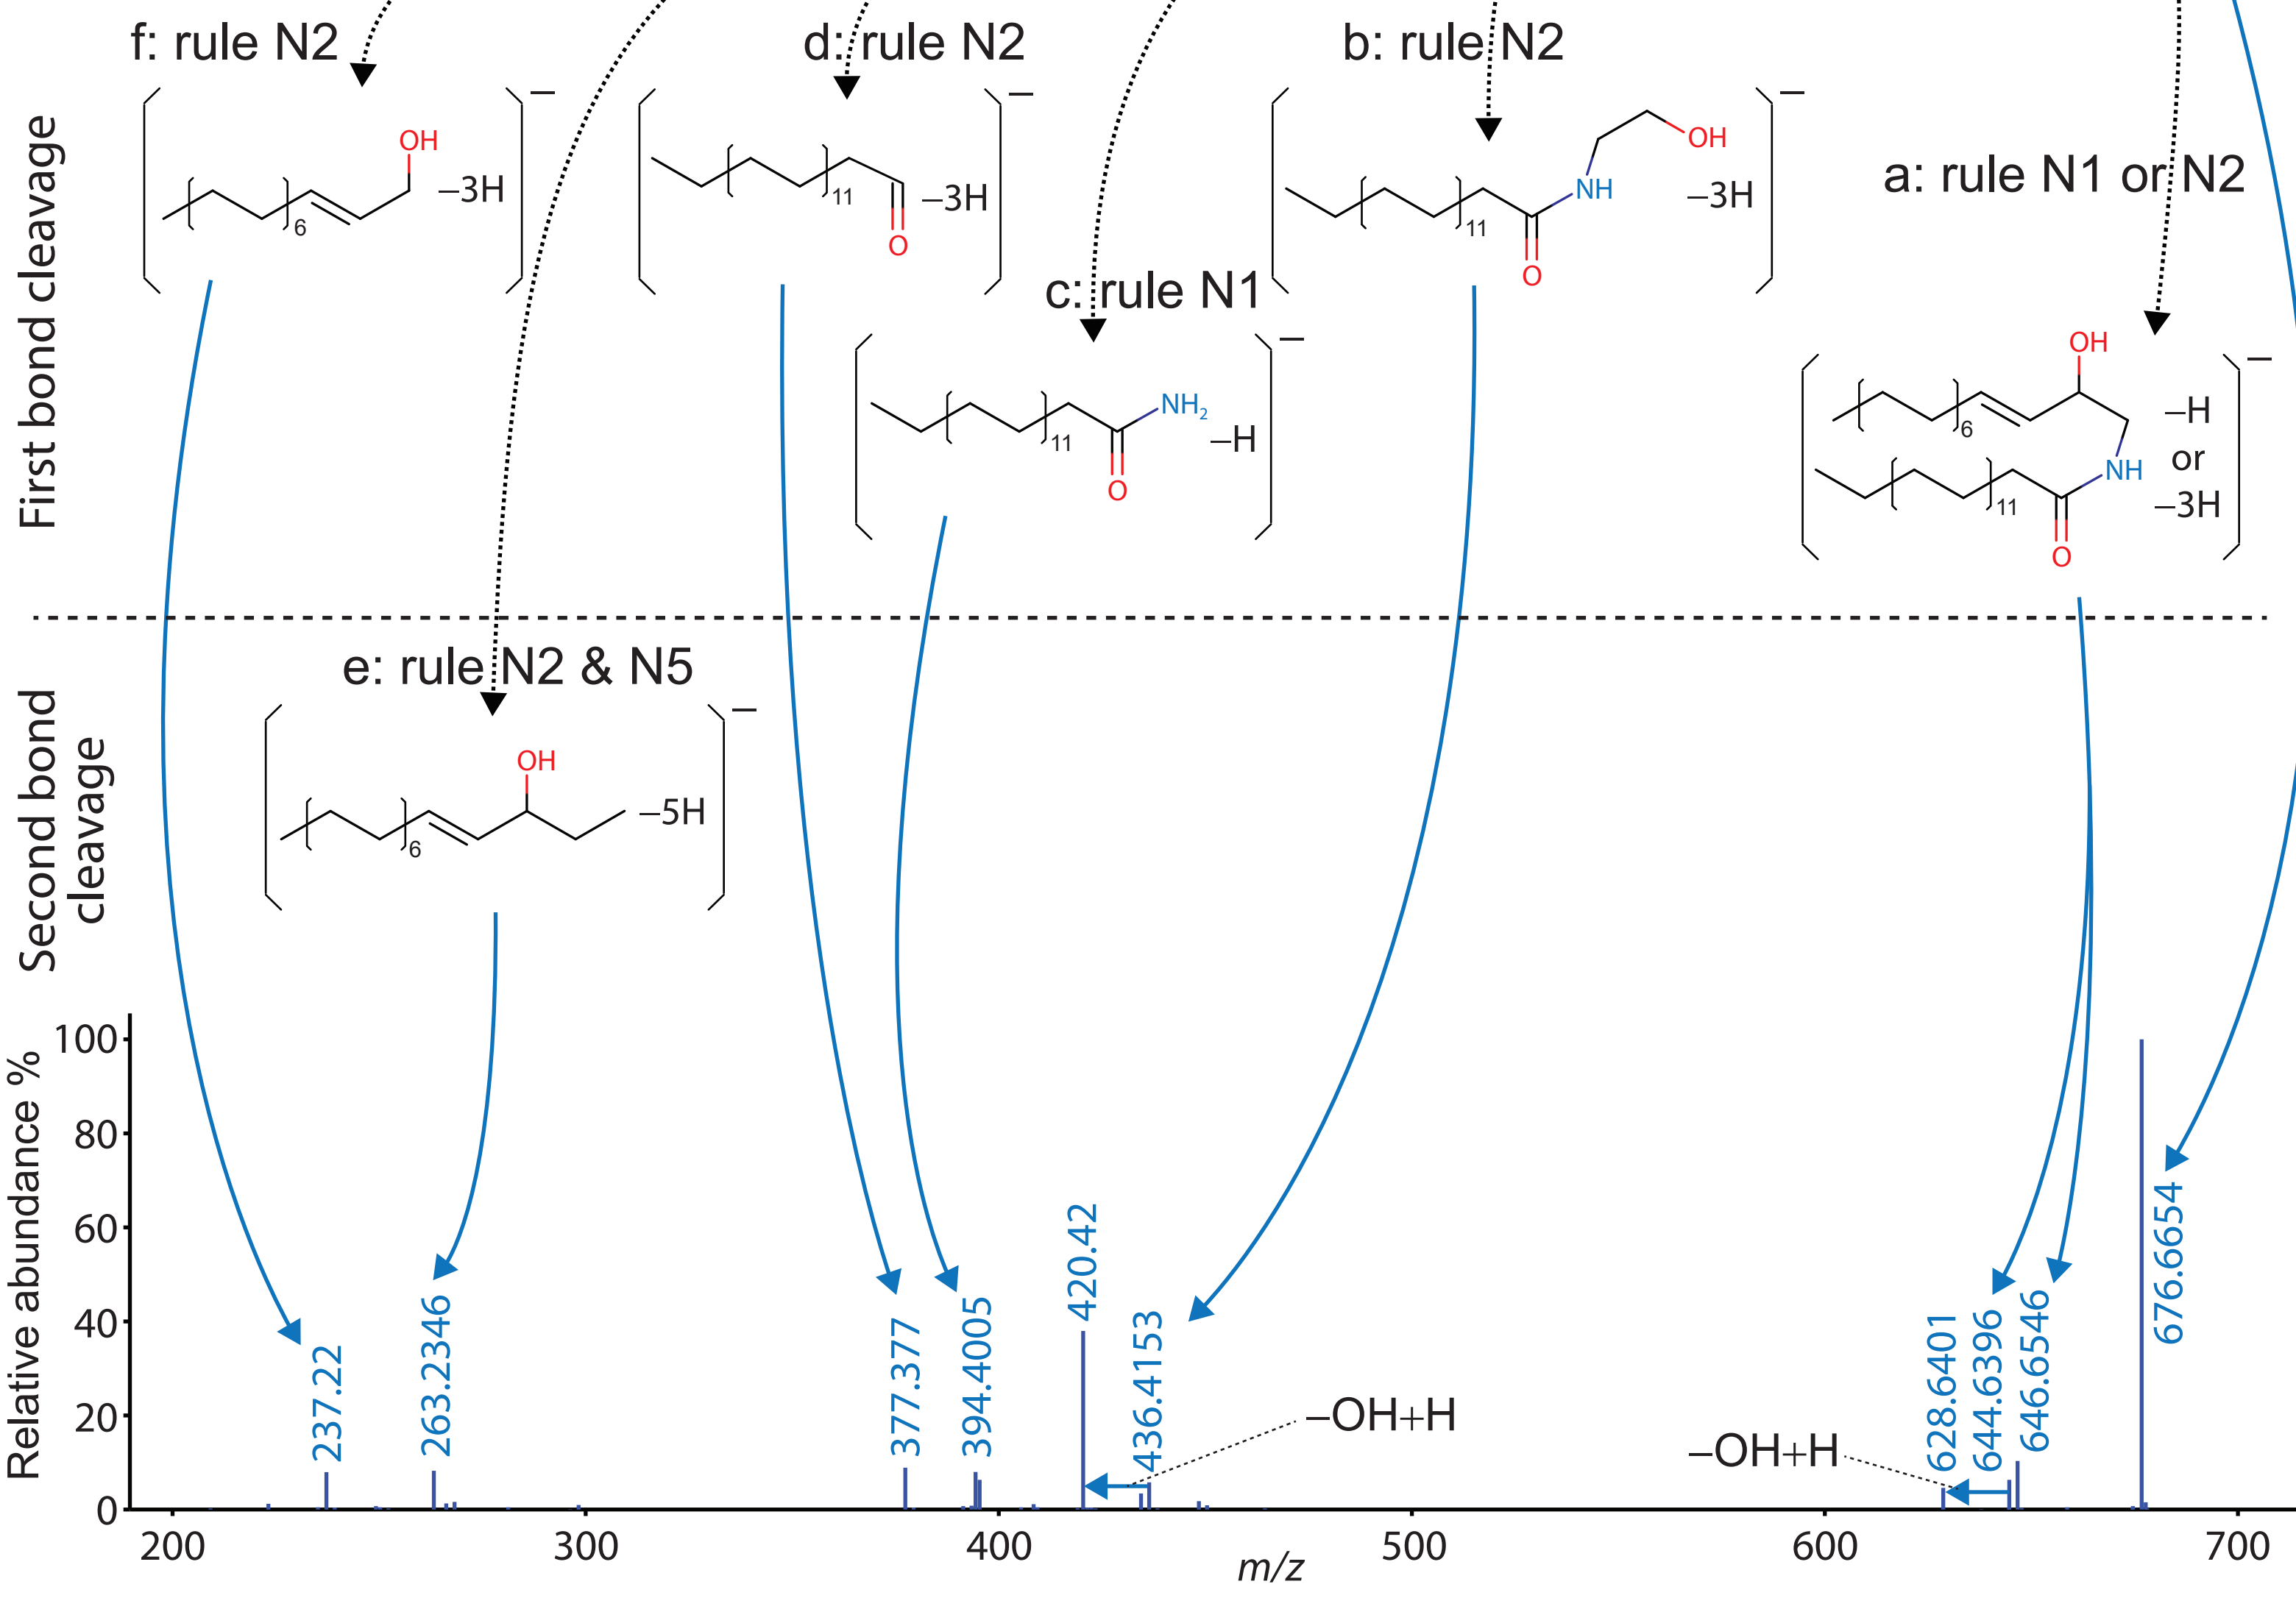

Ceramide [NDS] (d18:0/26:0); [M+CH<sub>3</sub>COOH-H]<sup>-</sup>

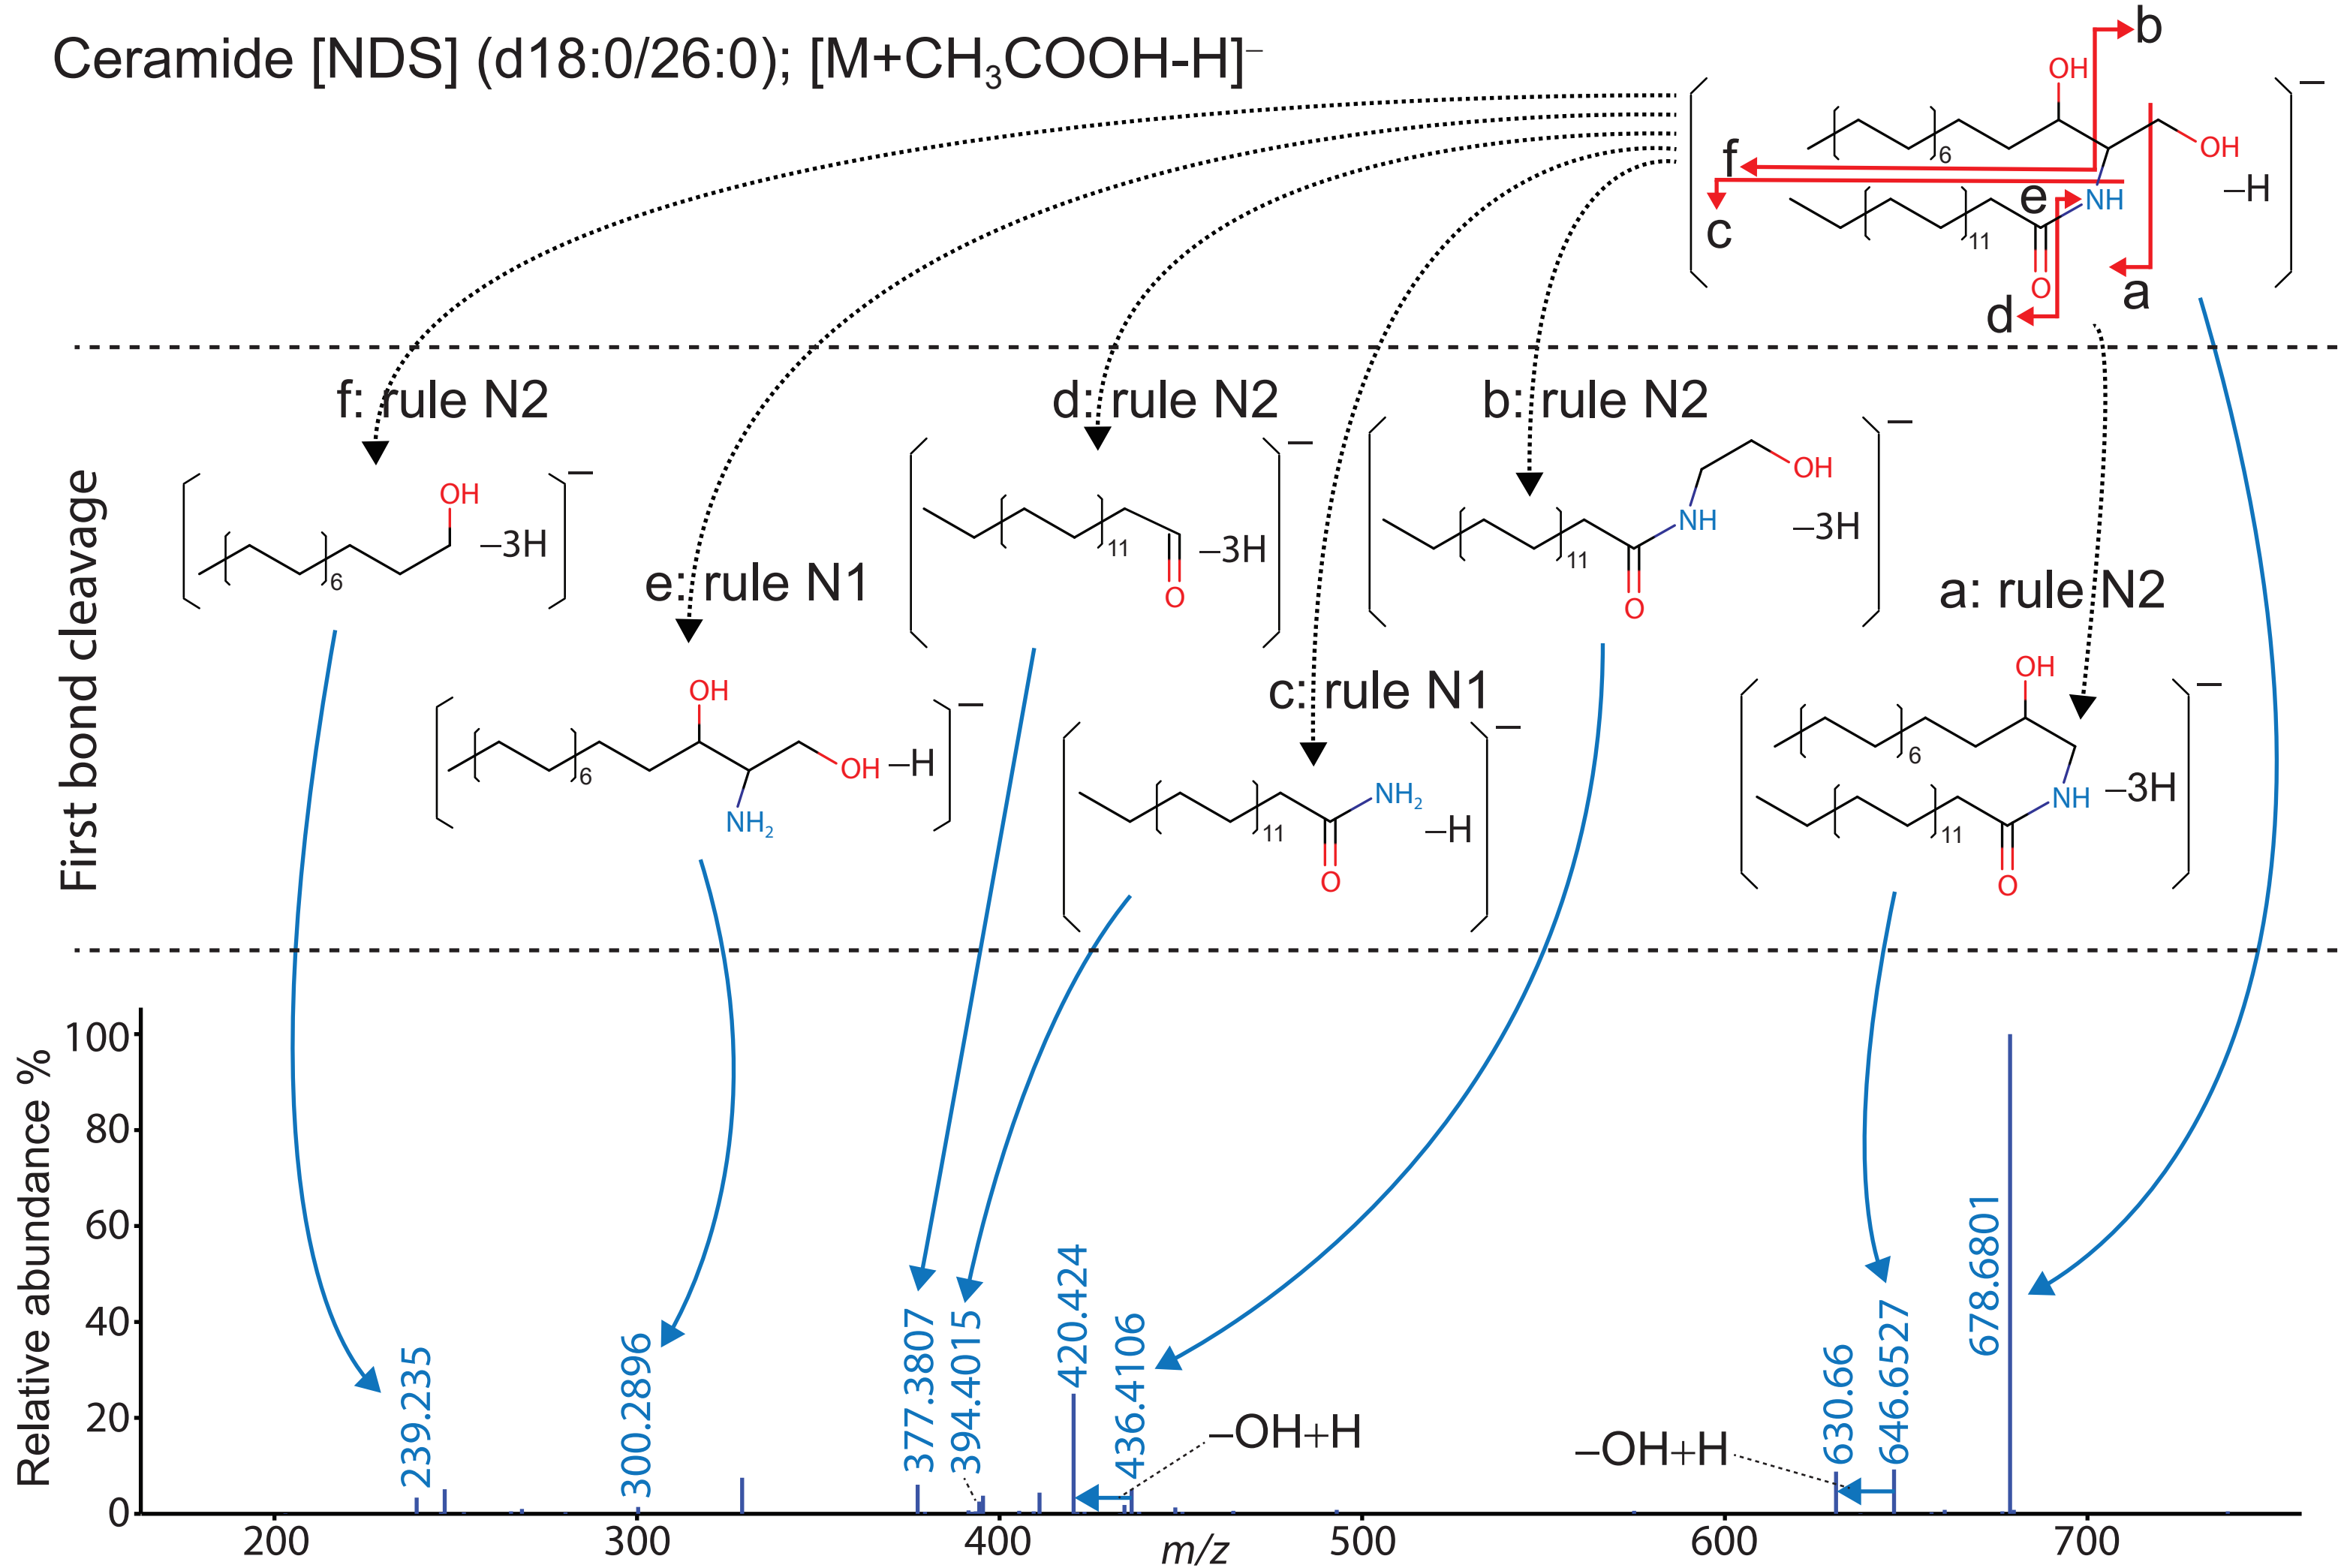

Ceramide [BS] (d18:1/26:0); [M-H]<sup>-</sup>

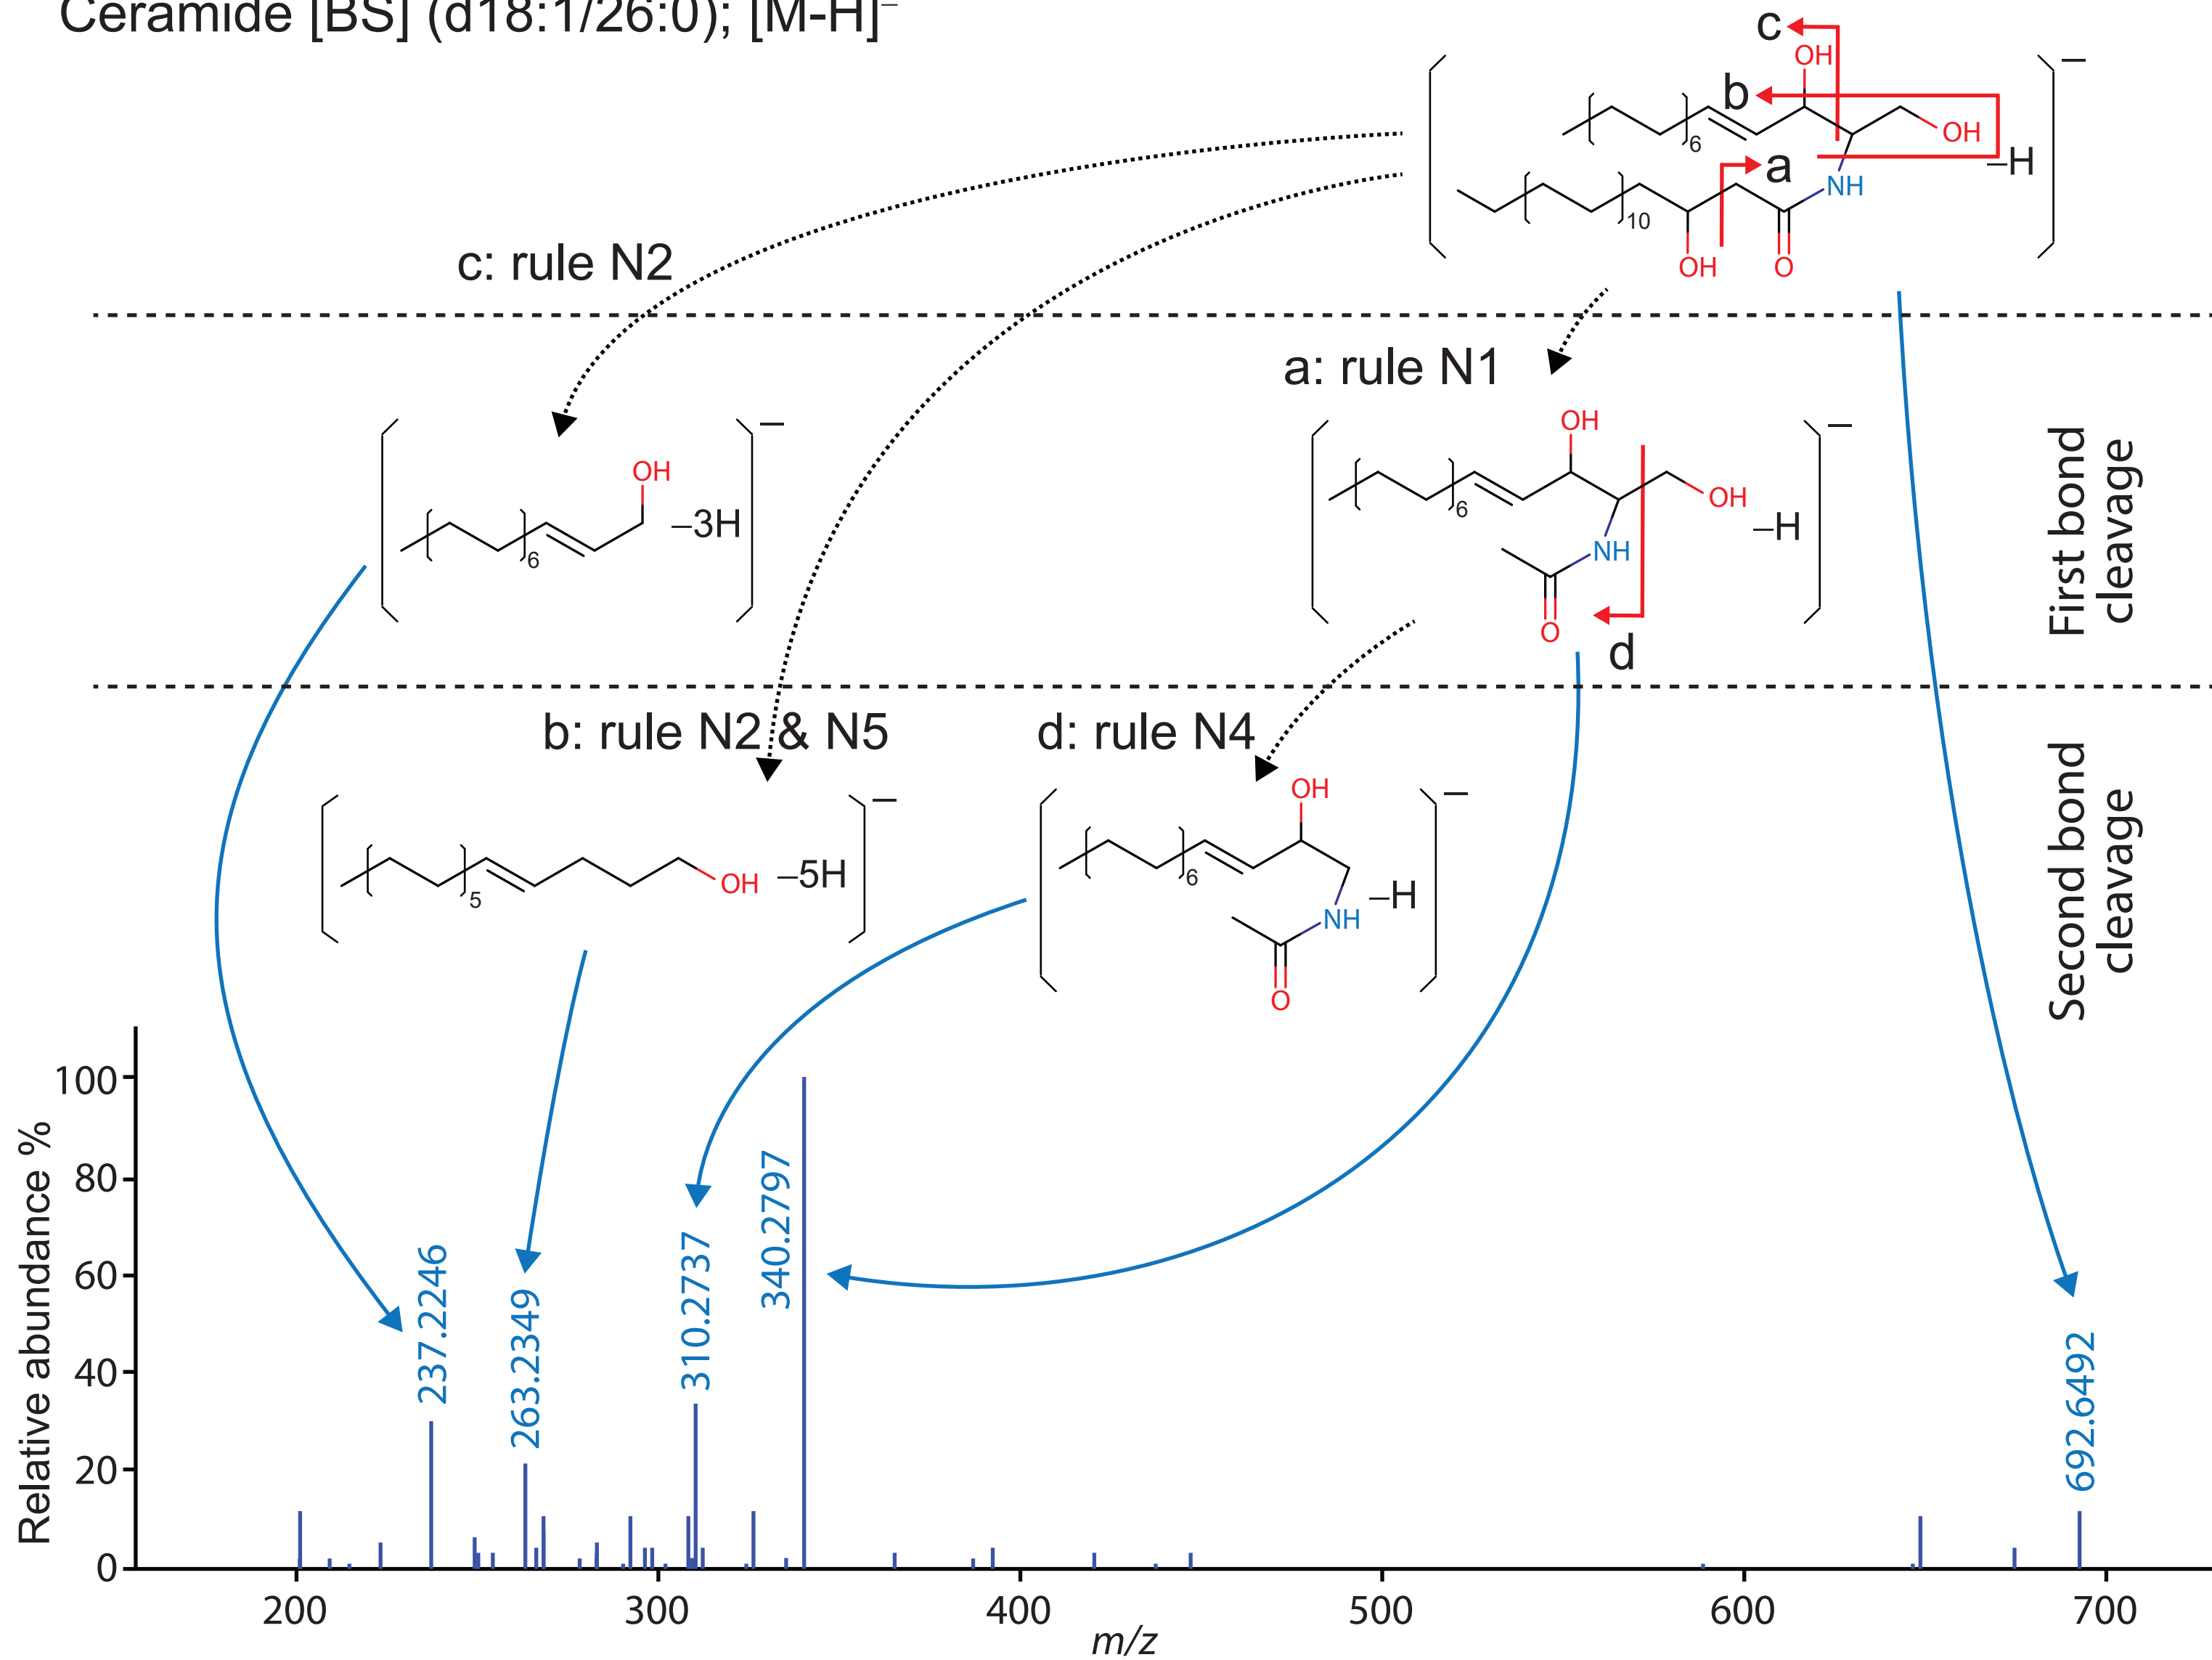

Ceramide [BDS] (d16:0/26:0);  $[M+CH_3COOH-H]^-$

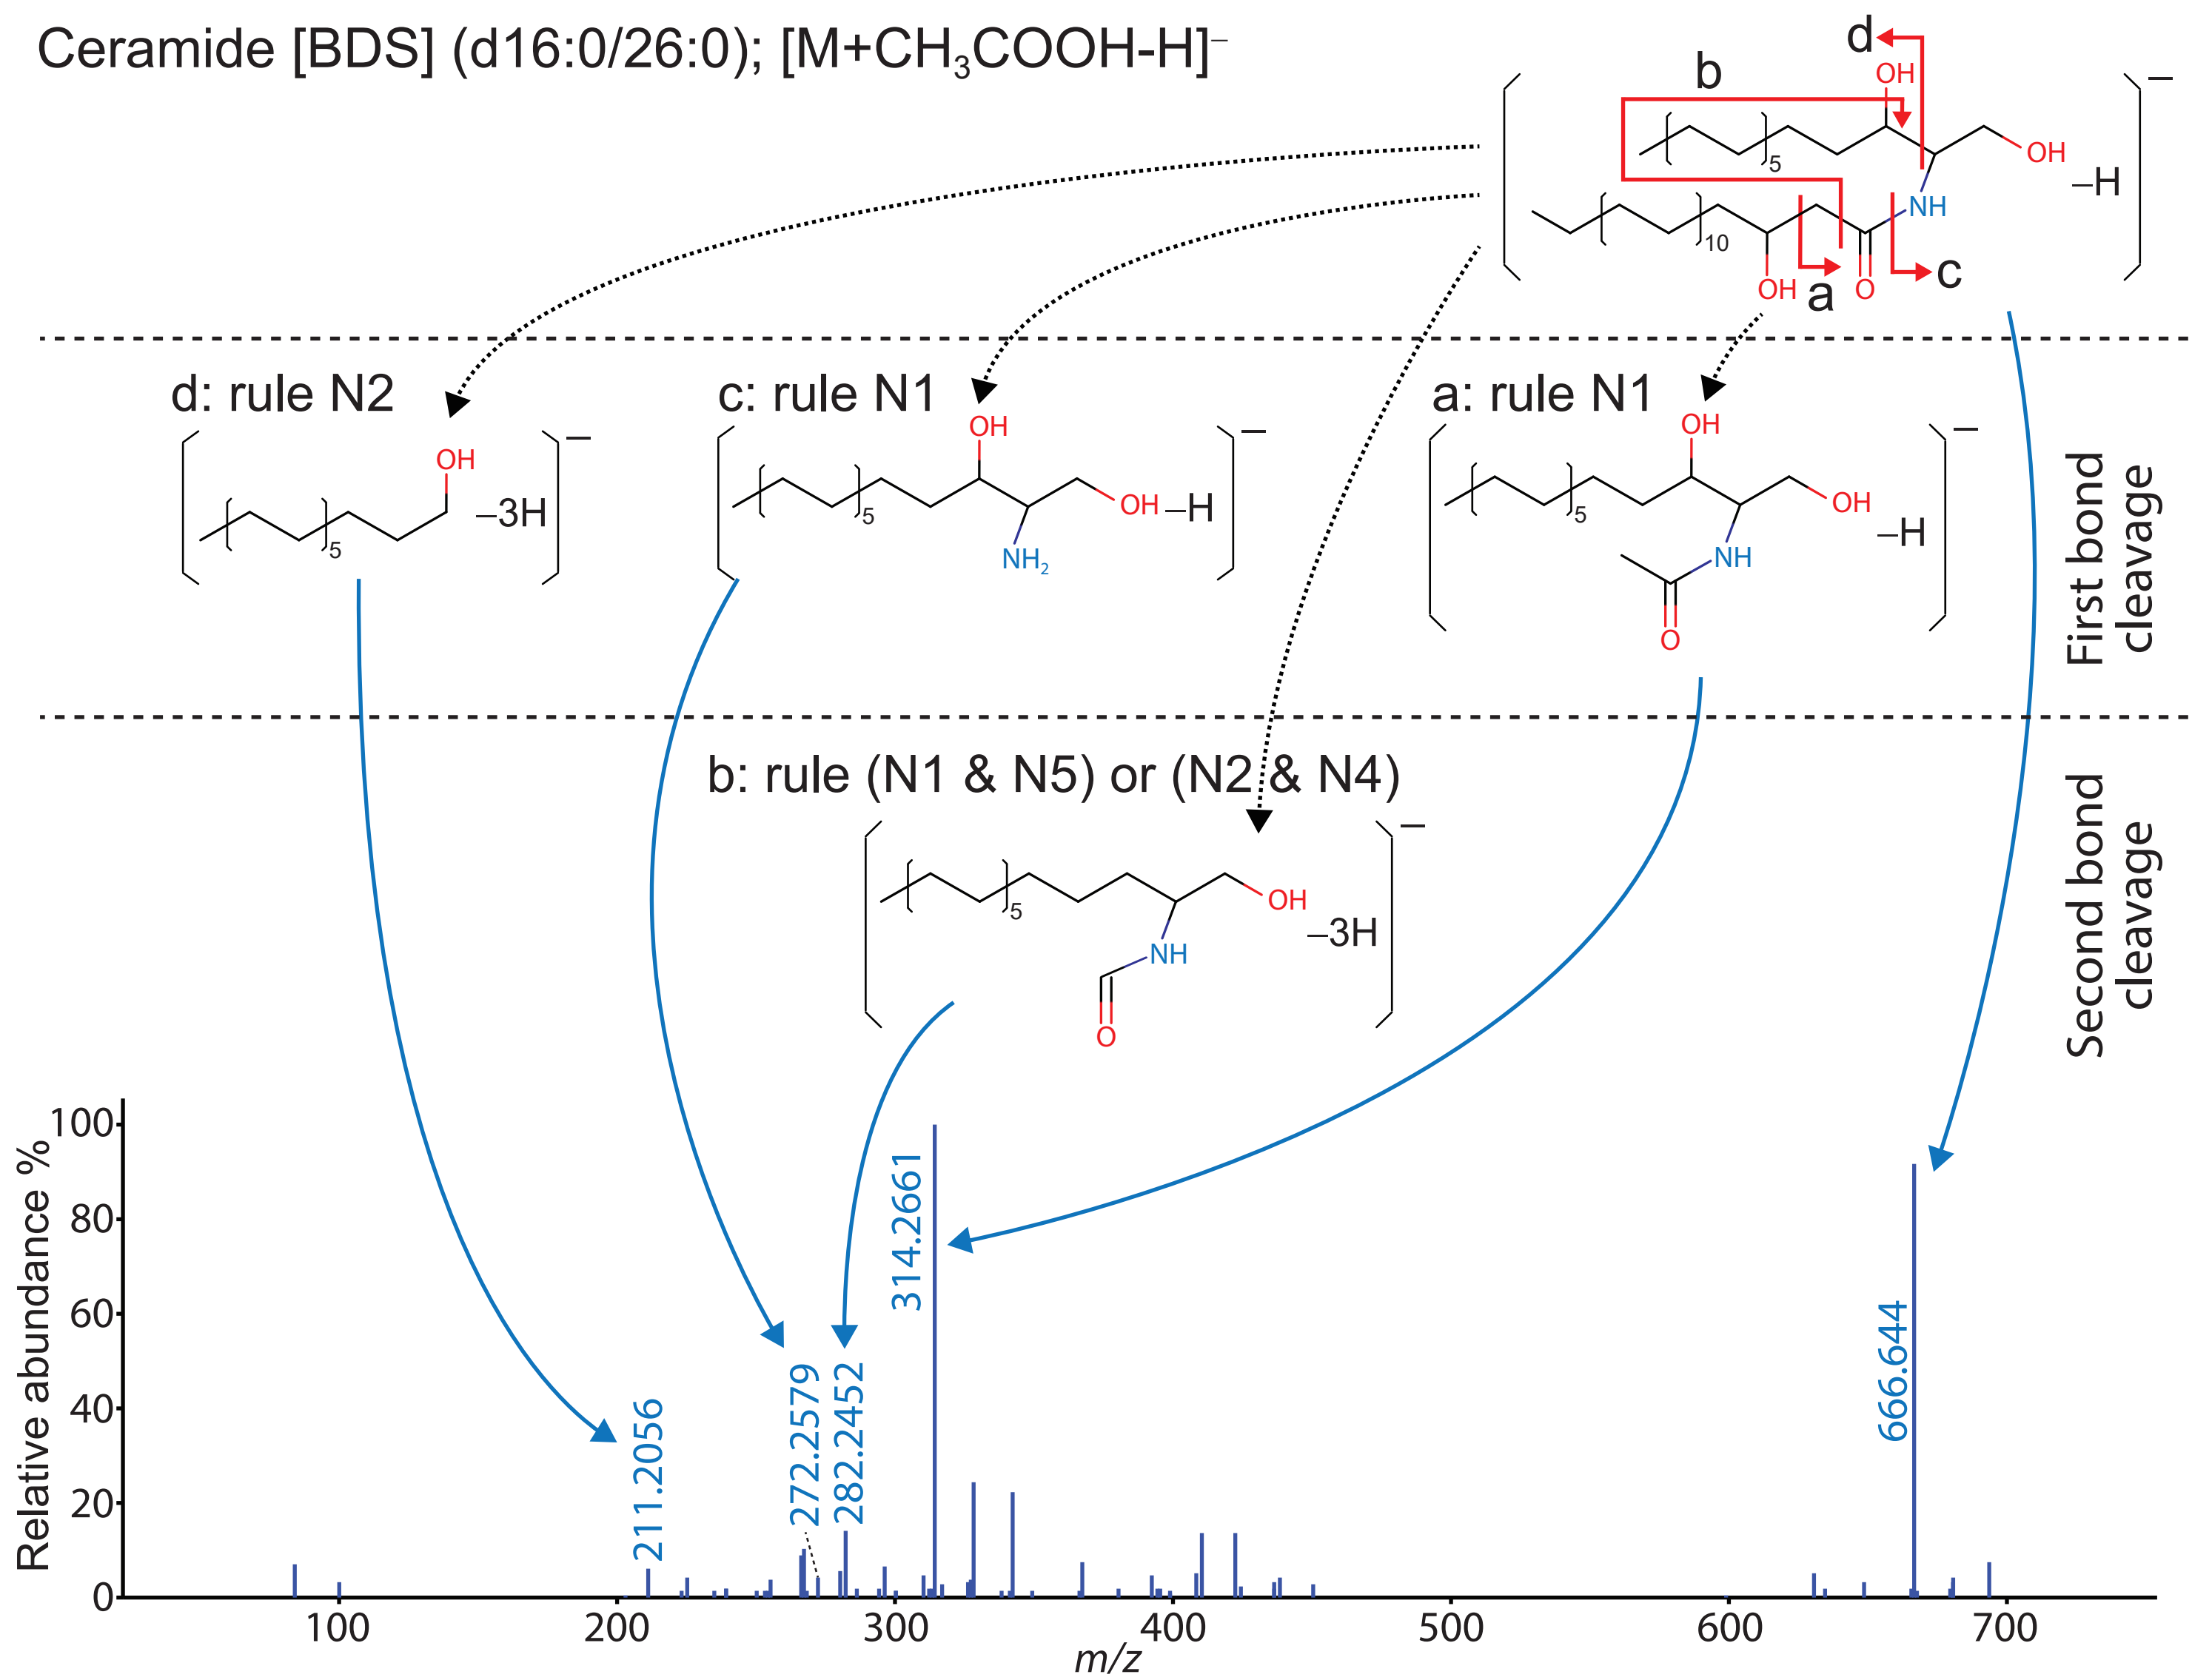

Ceramide [AS] (d18:1/16:0);  $[M+CH_3COOH-H]^-$

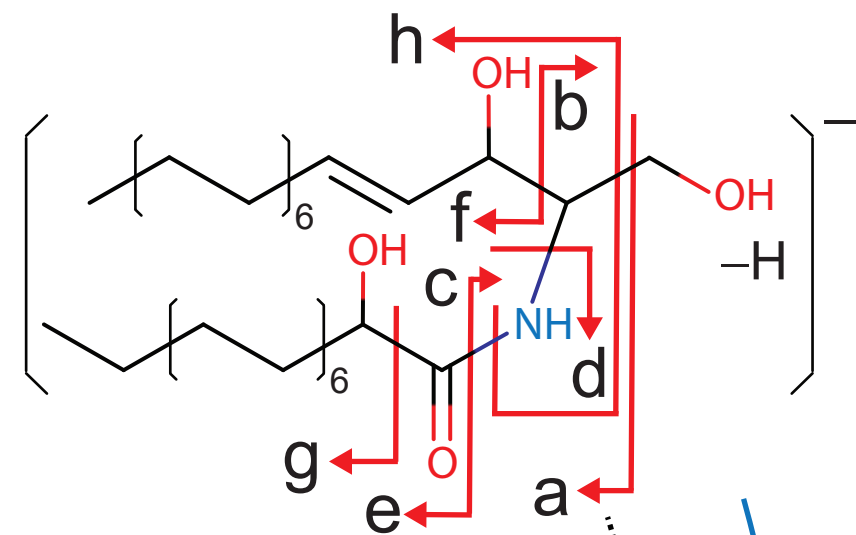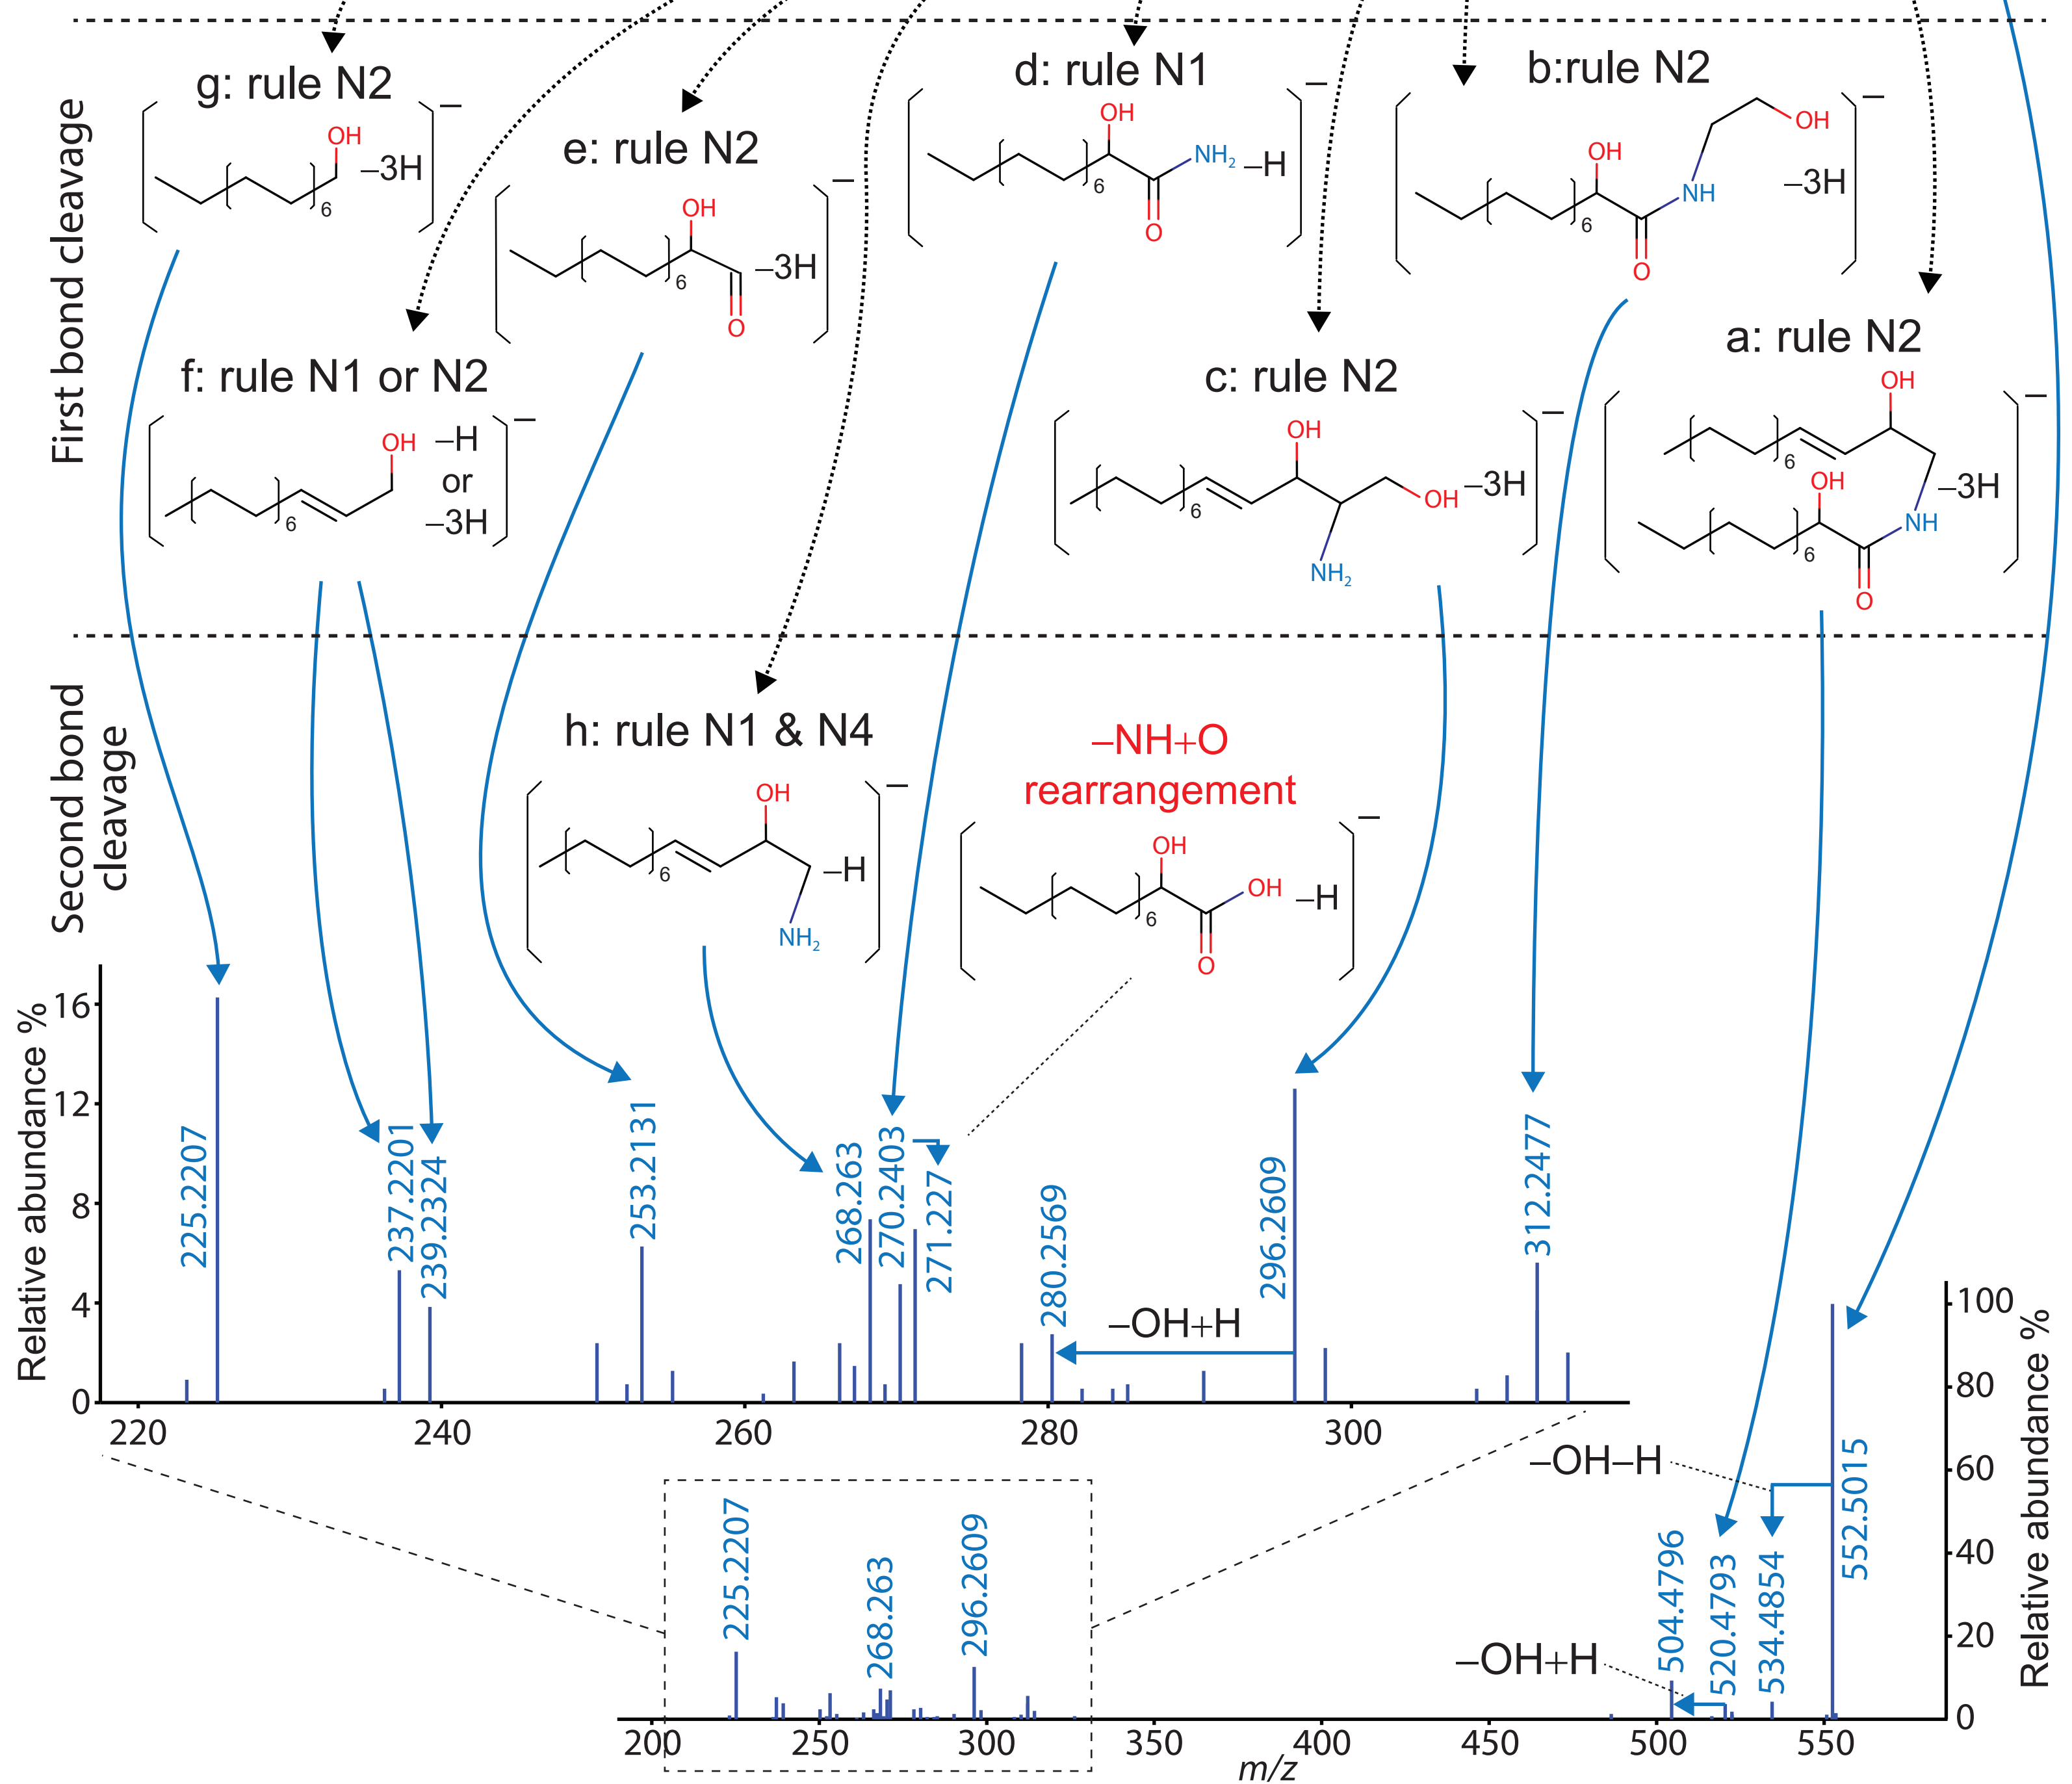

Ceramide [ADS] (d18:0/16:0);  $[M+CH_3COOH-H]^-$

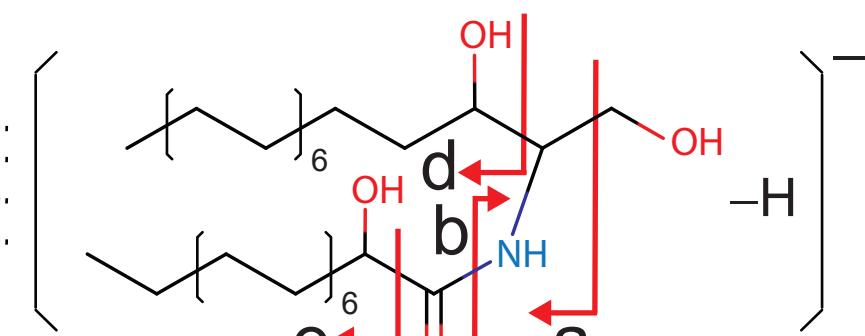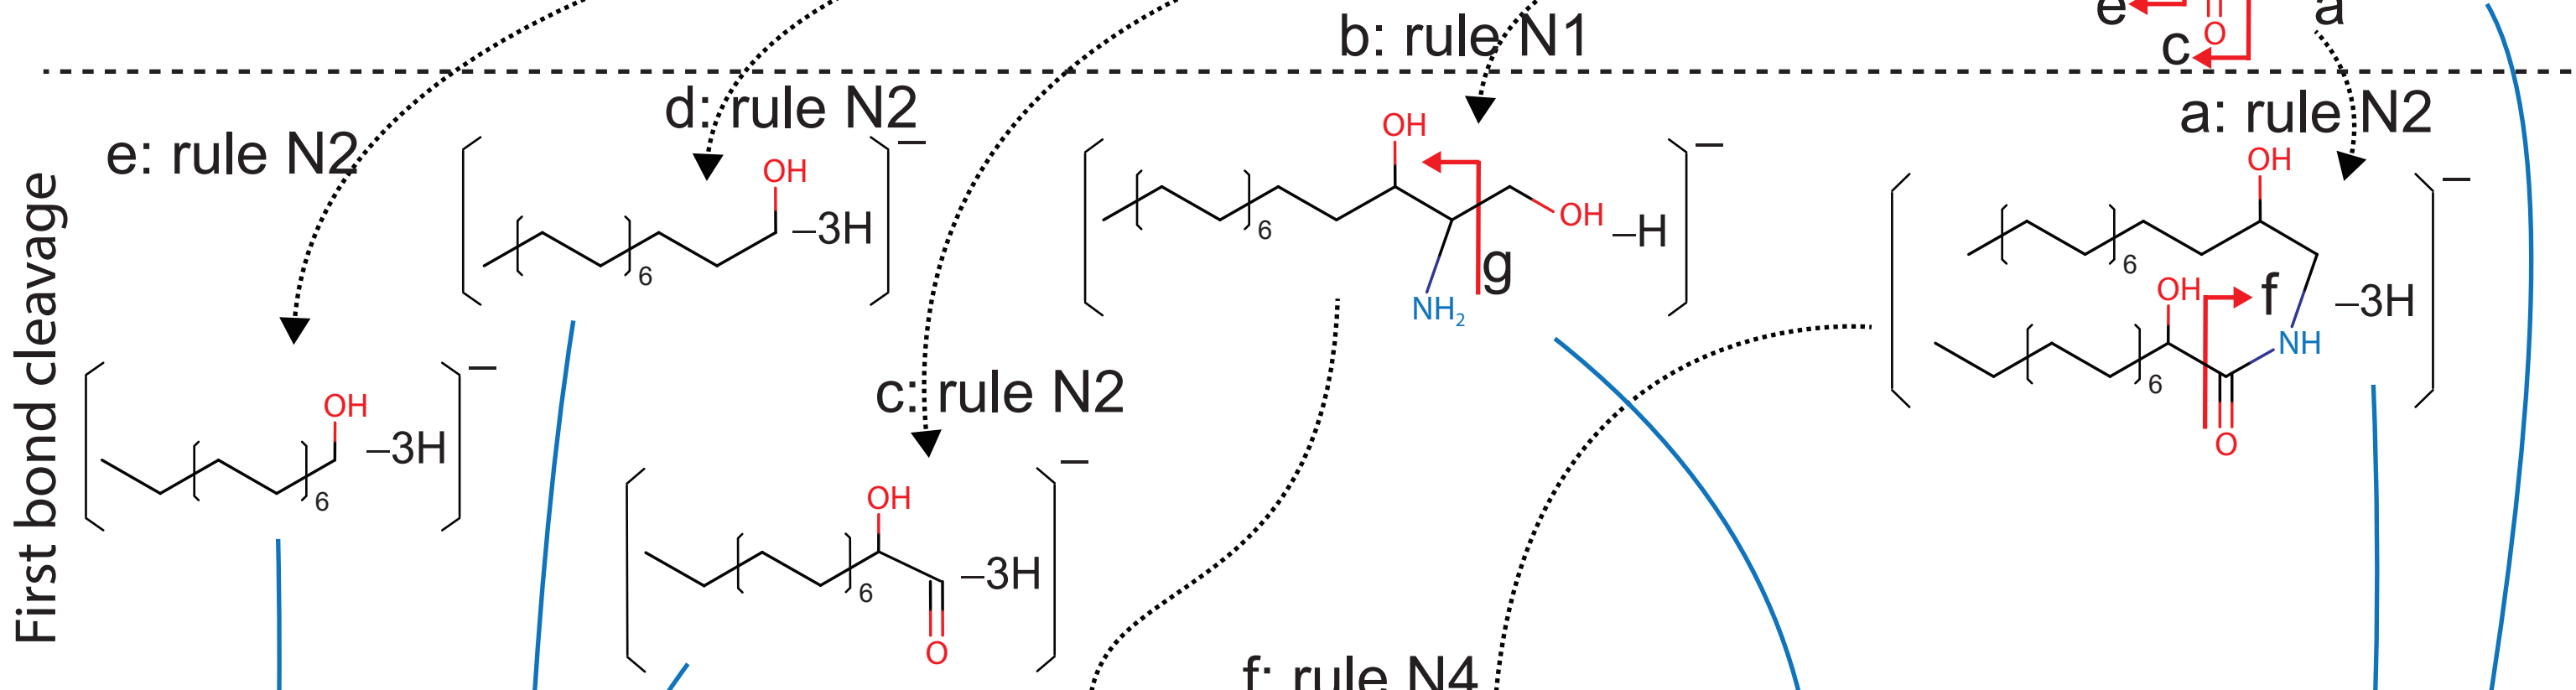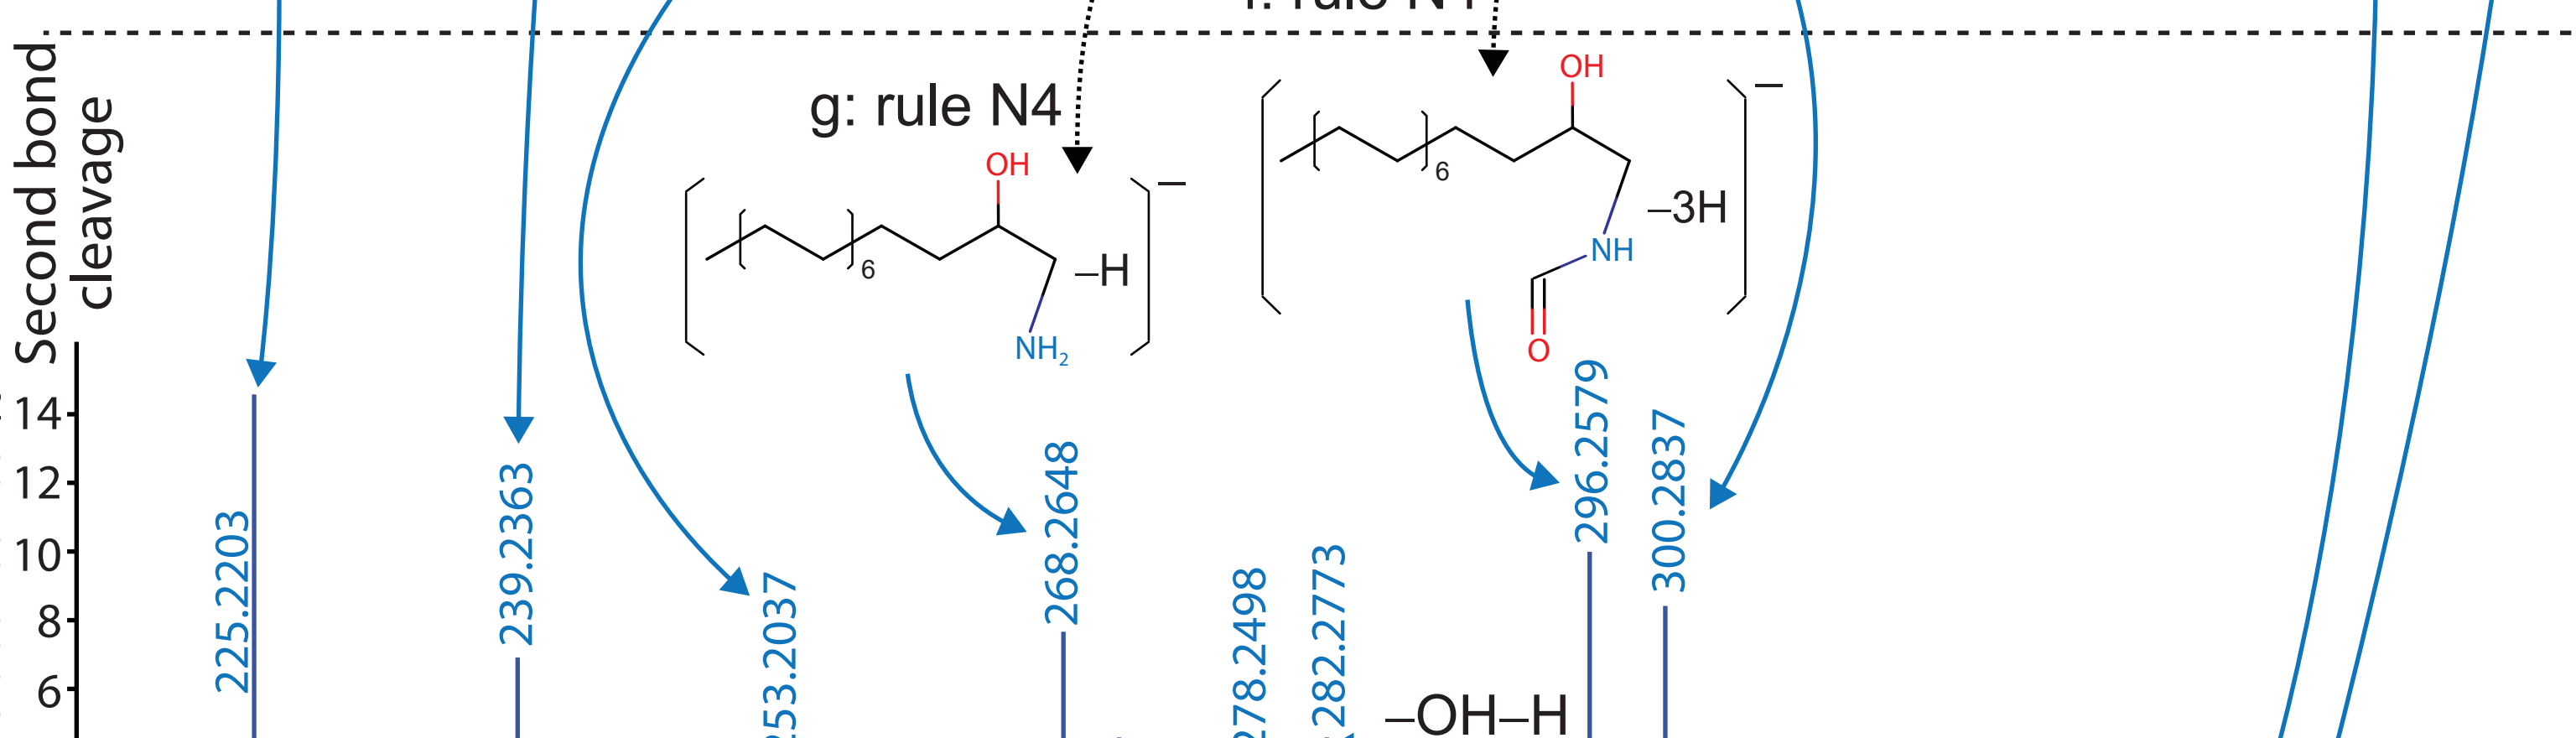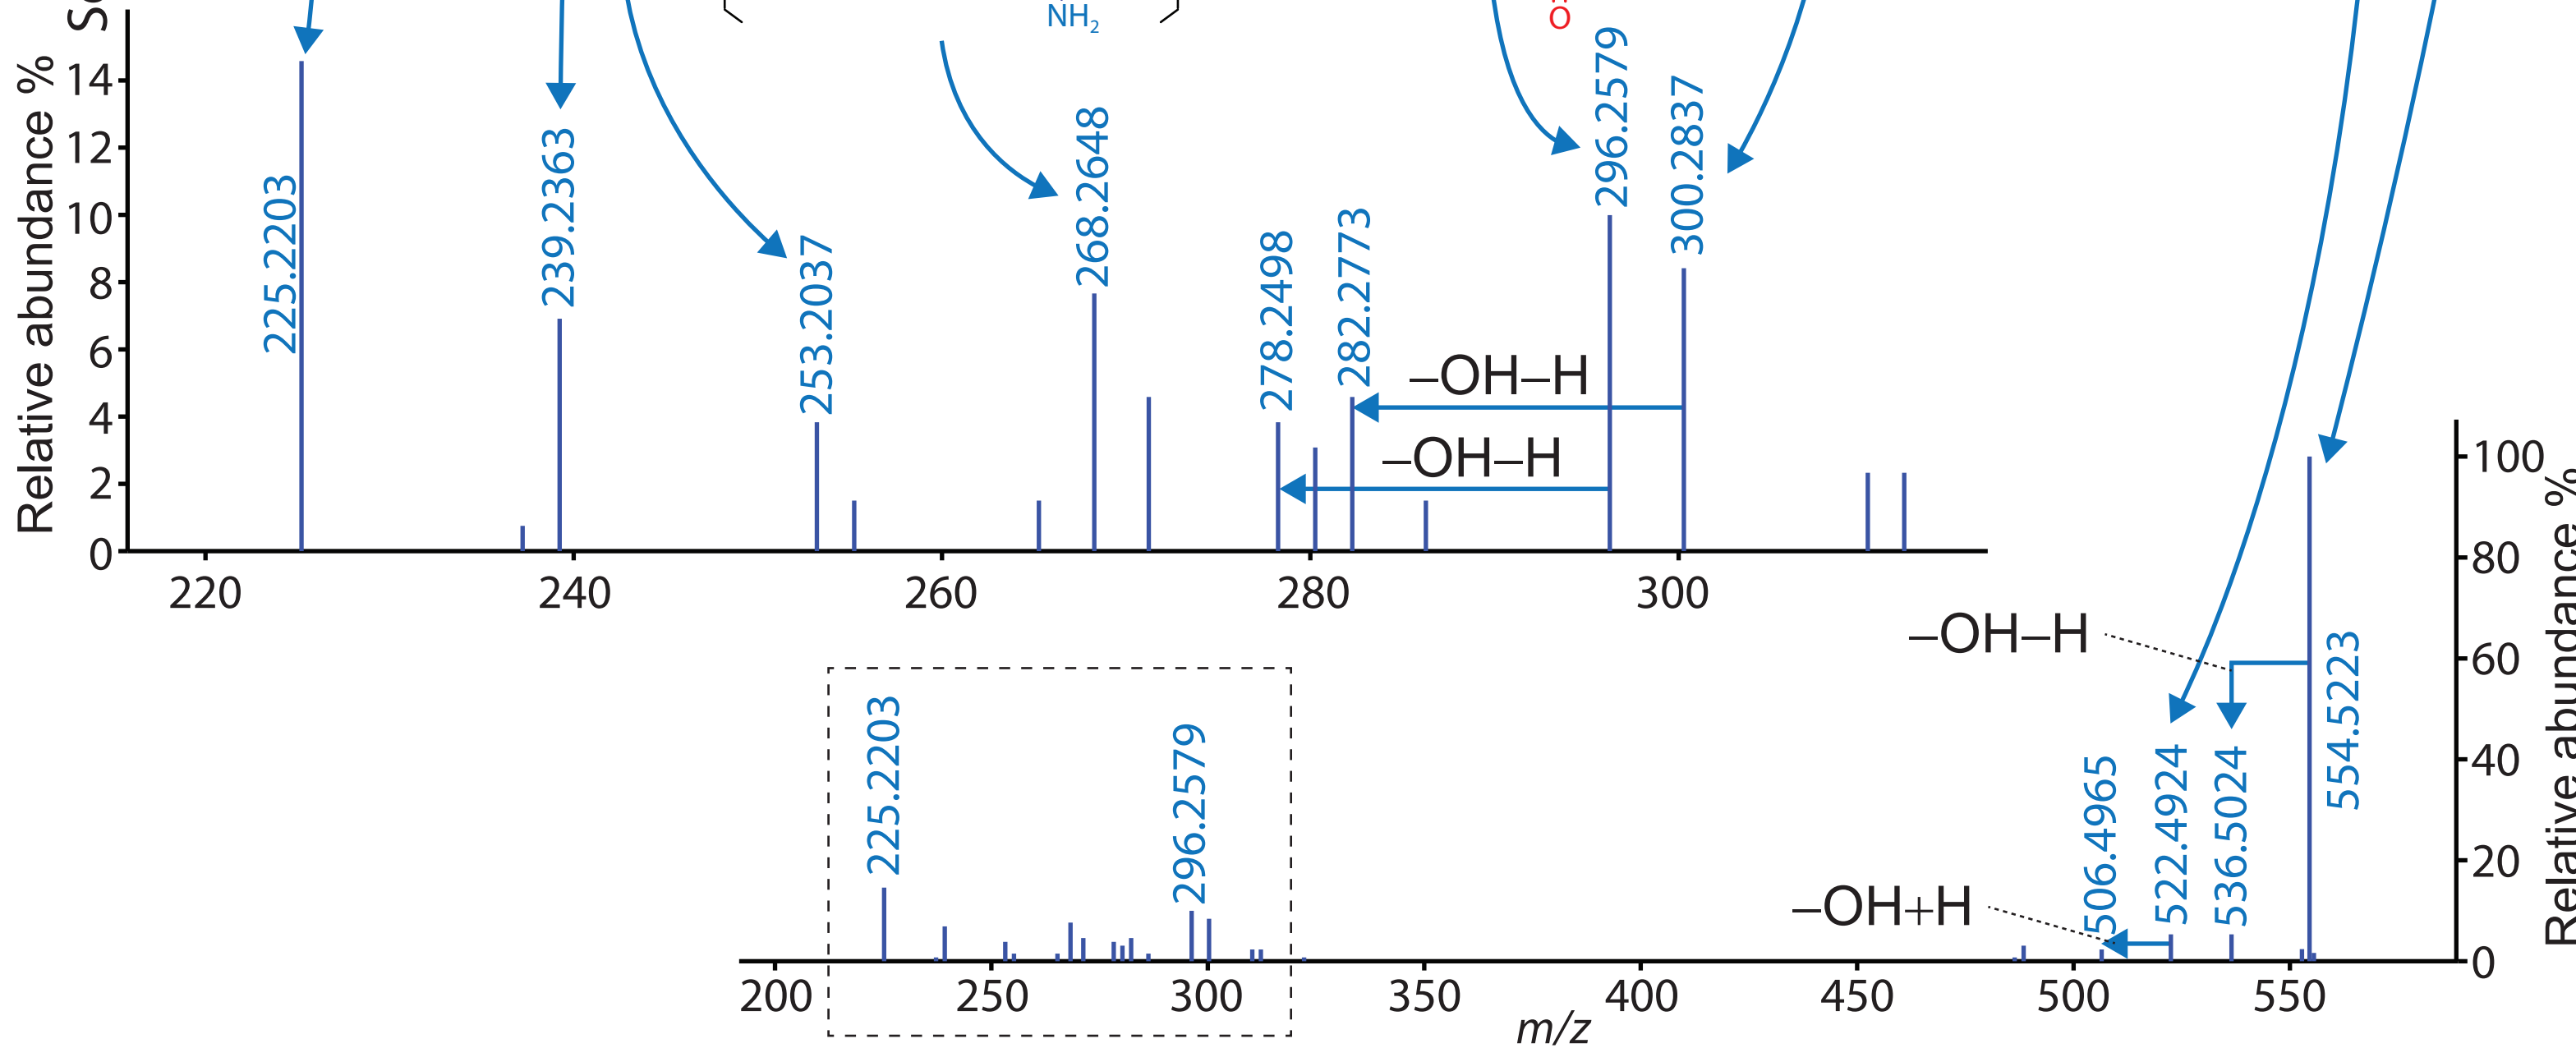

Hex-Ceramide [NS] (d18:1/24:0);  $[M+CH_3COOH-H]^-$

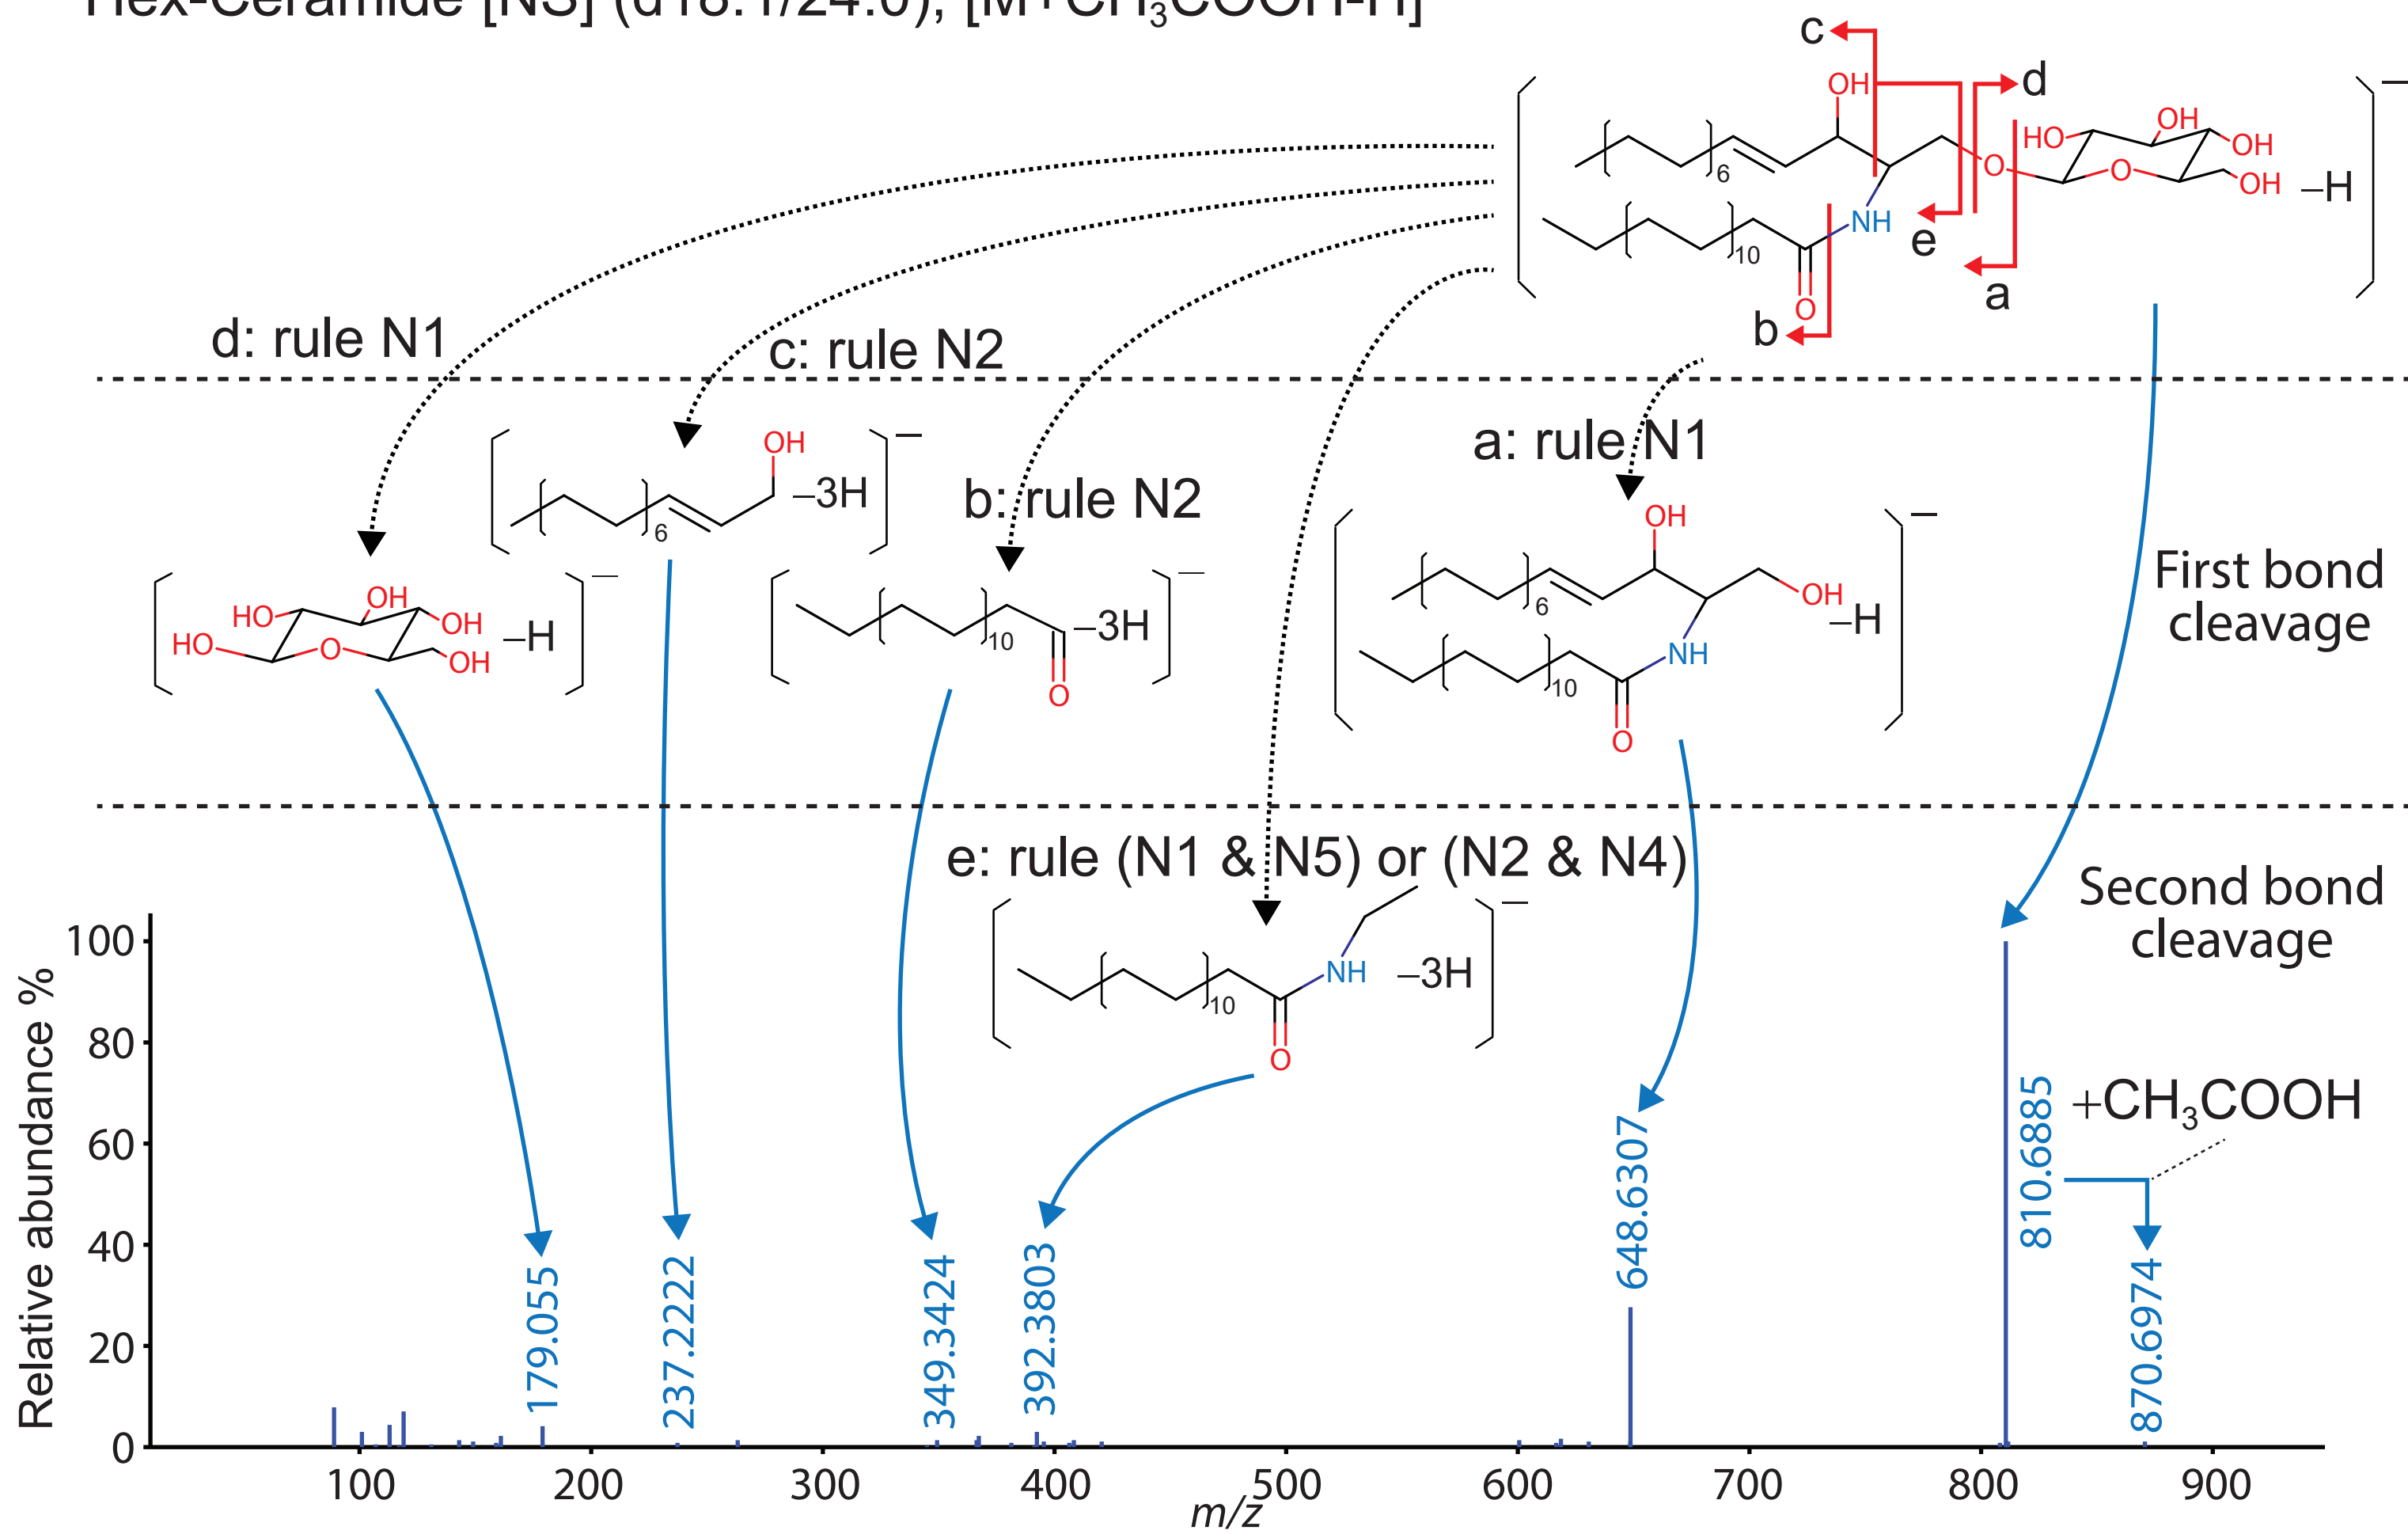

Ceramide [EOS] (d17:1/32:0-O-18:2);  $[M+CH_3COOH-H]^-$

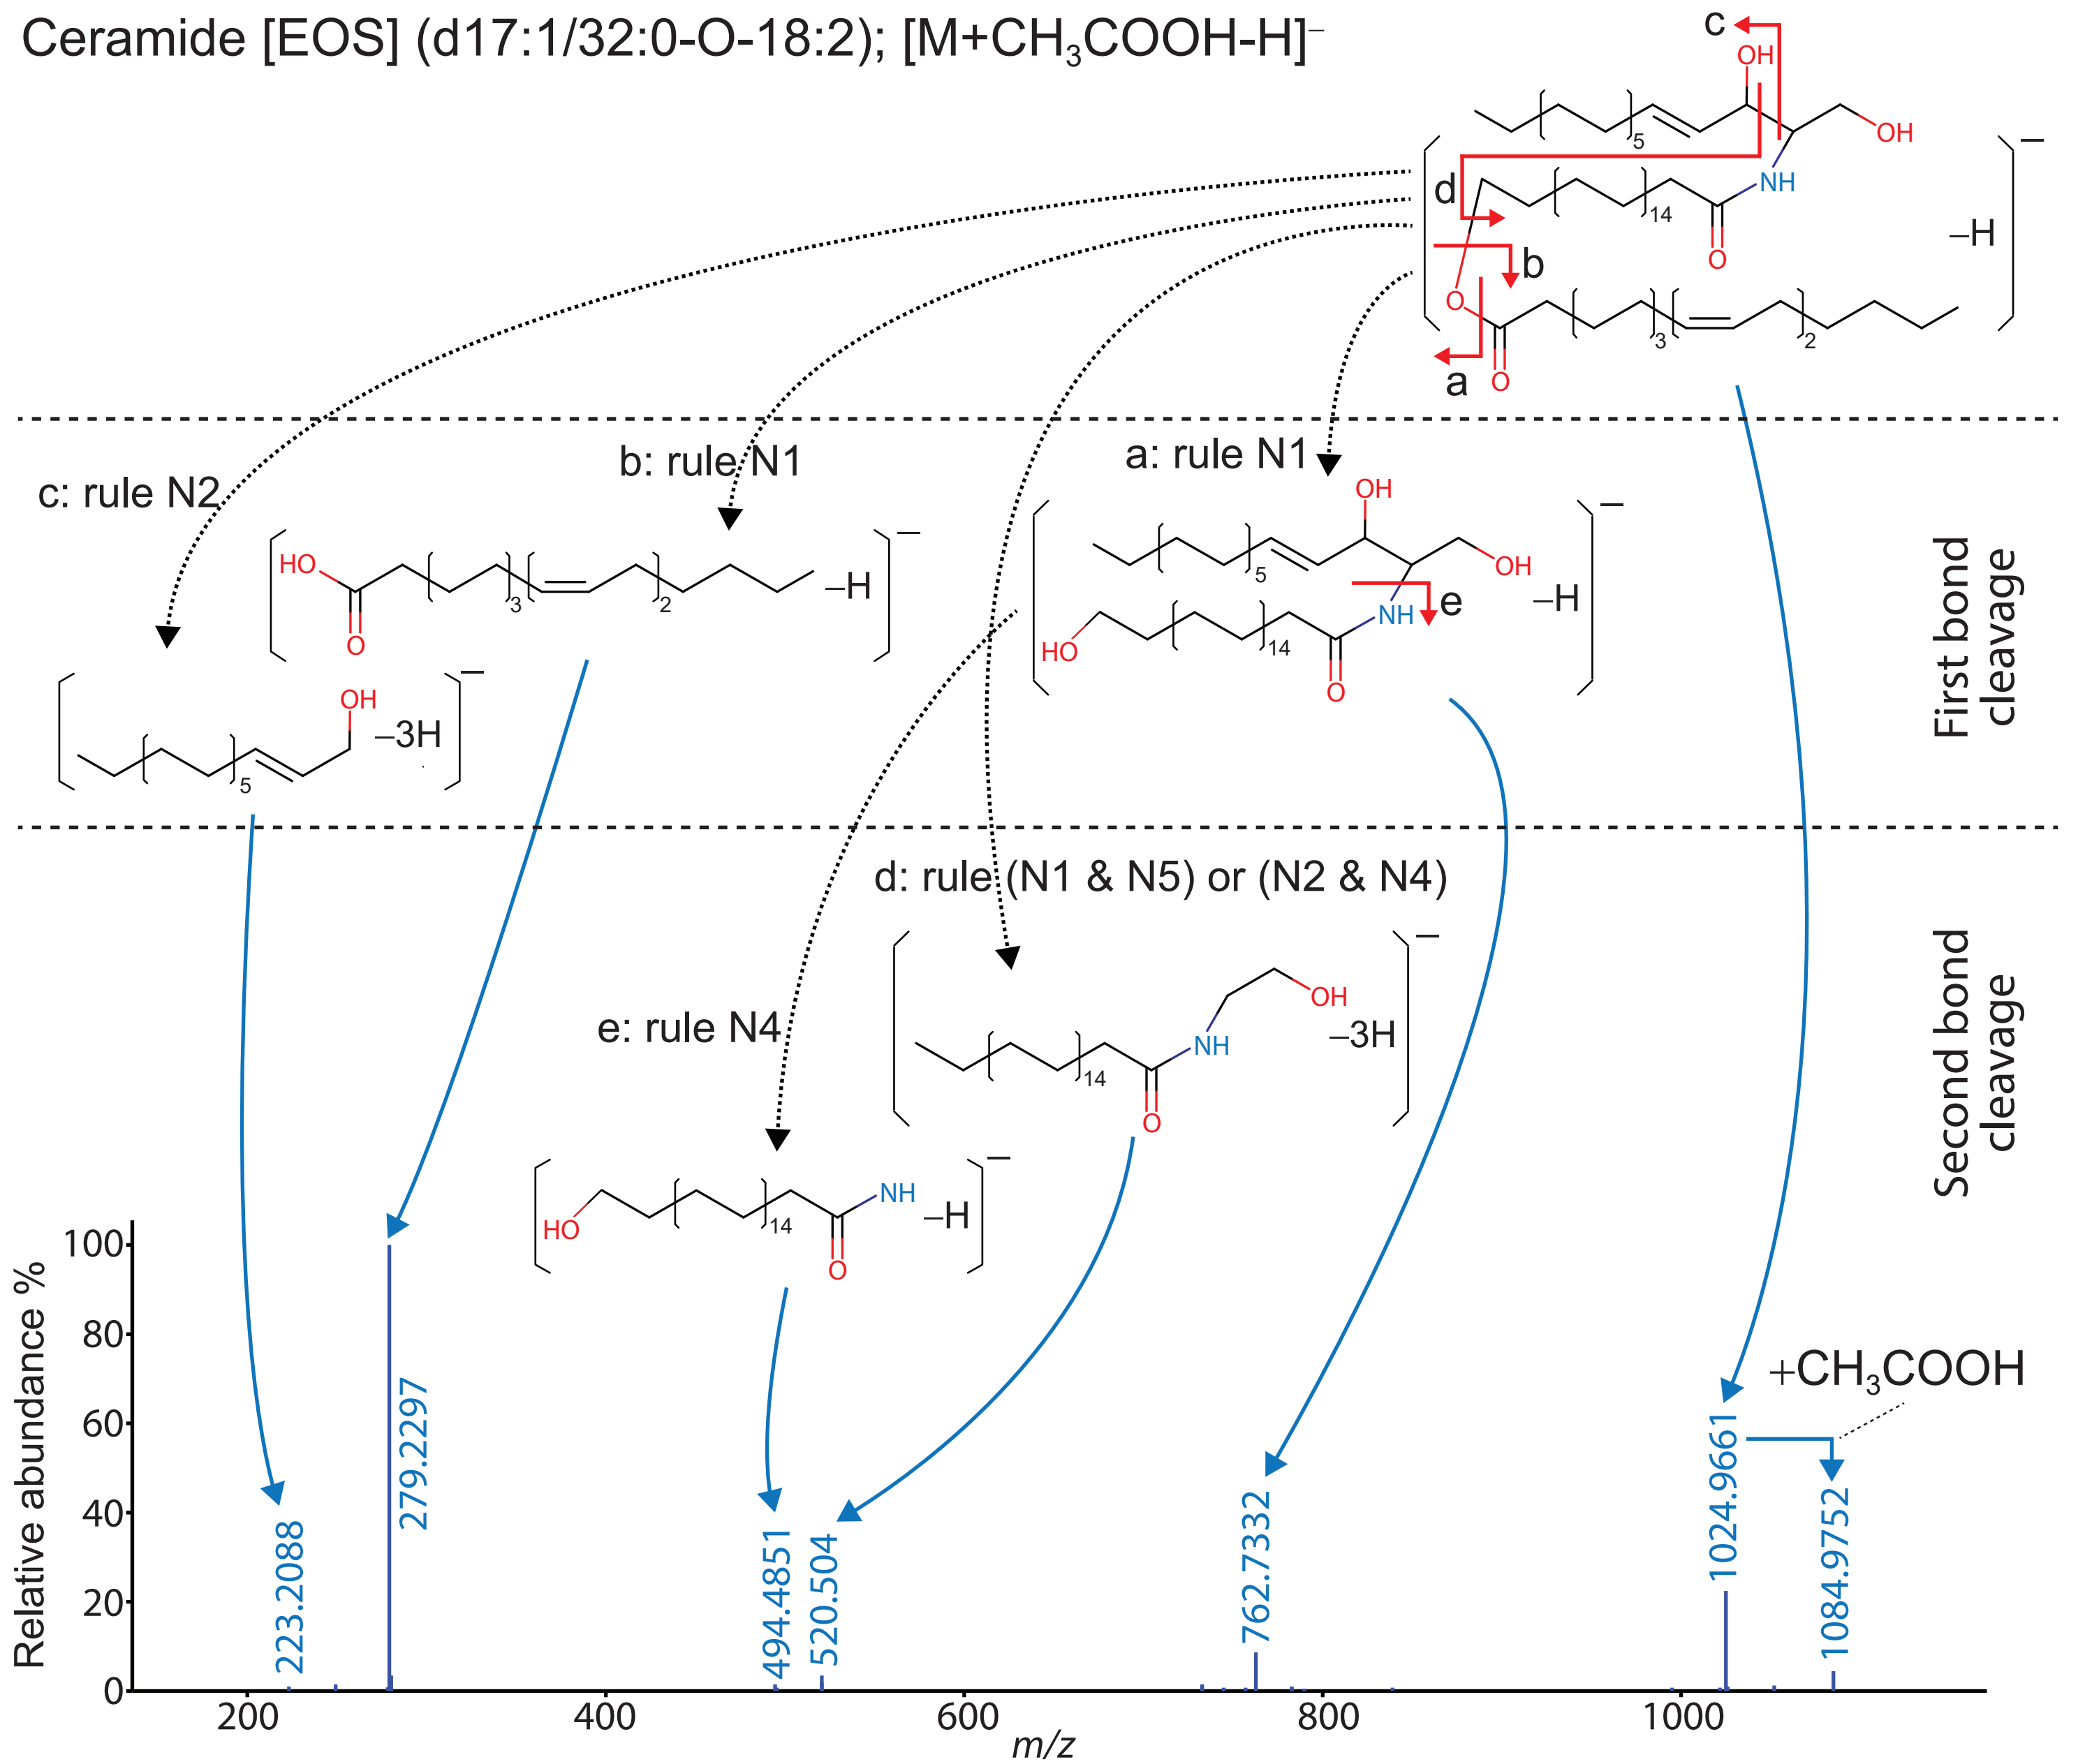



Ceramide [NP] (d18:0/16:0);  $[M+CH_3COOH-H]^-$

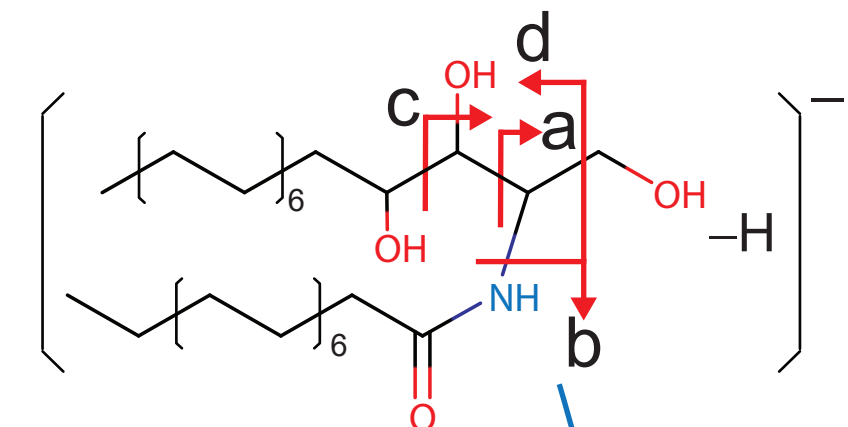

b: rule N1

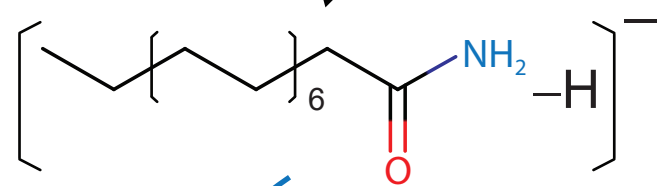

a: rule N1 or N2

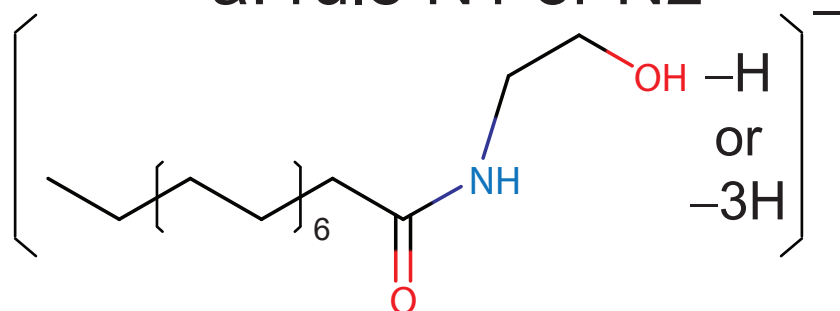

First bond cleavage

d: rule N2 & N5

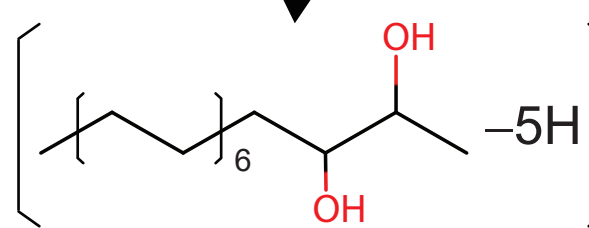

-NH+O rearrangement

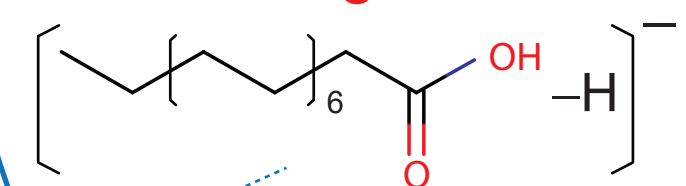

c: rule (N1 & N5) or (N2 & N4)

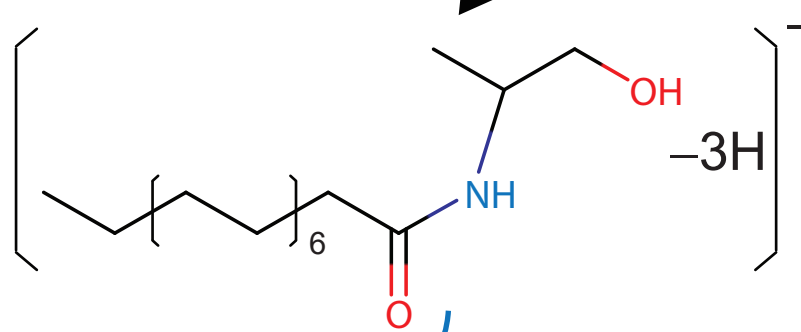

Second bond cleavage

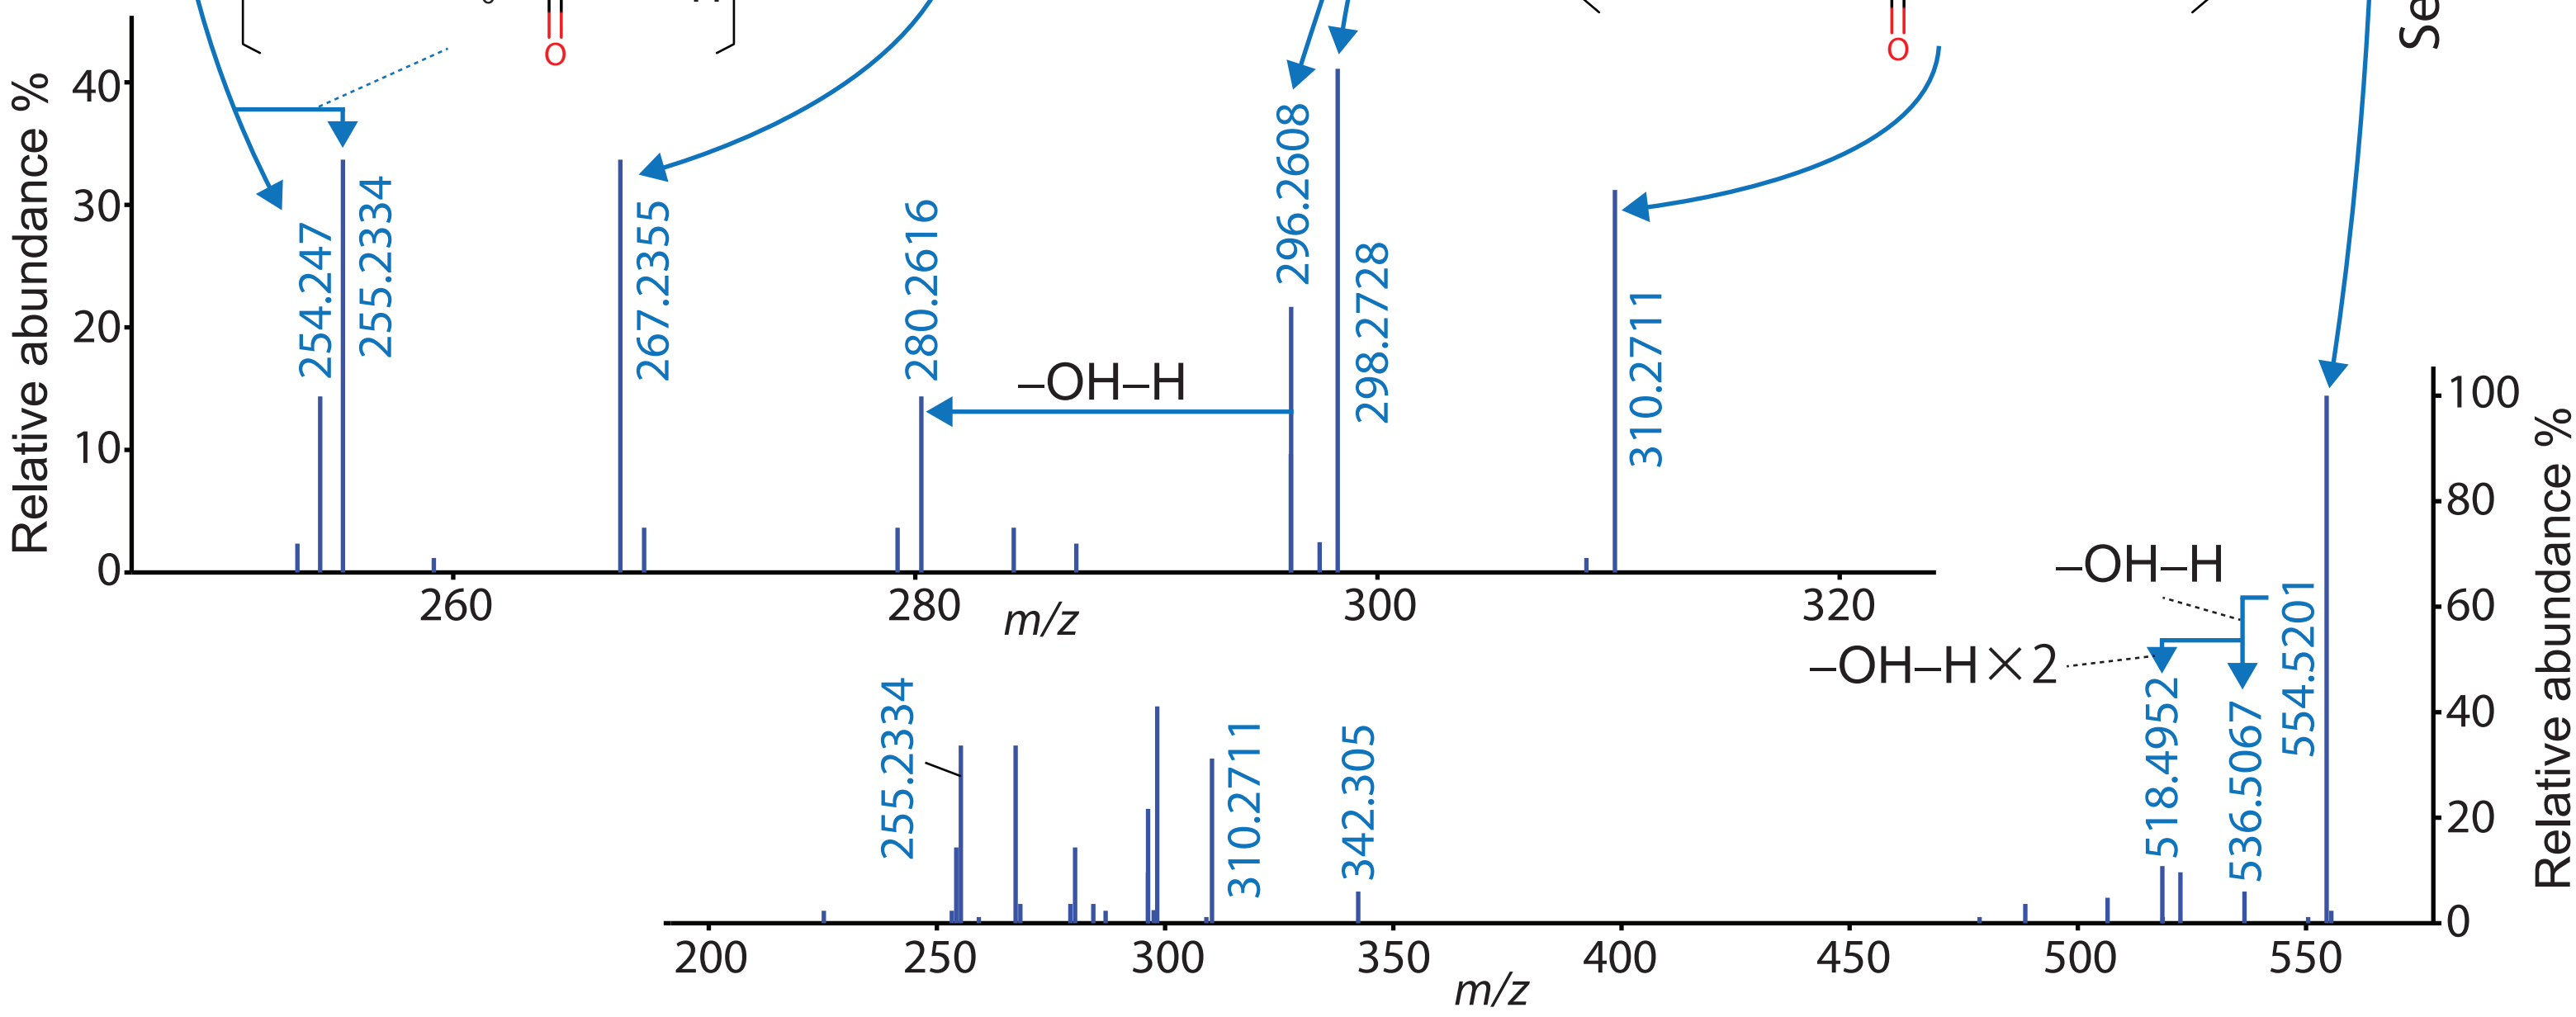

SM(d18:1/16:0); [M+CH<sub>3</sub>COOH-H]<sup>-</sup>

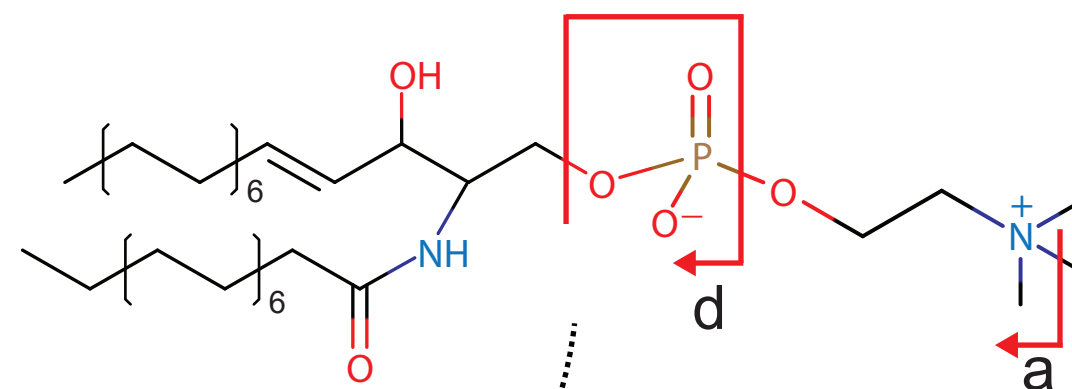

a: rule N1

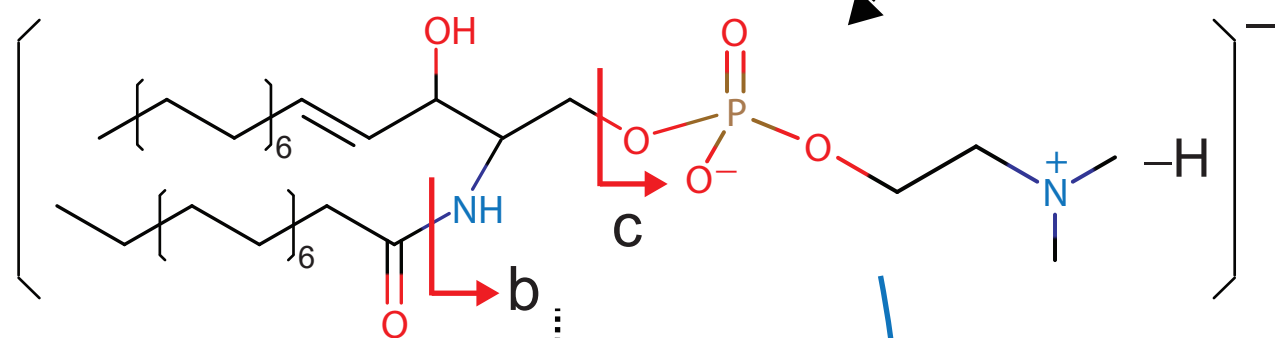

First bond cleavage

d: rule (N1 & N5) or (N2 & N4)

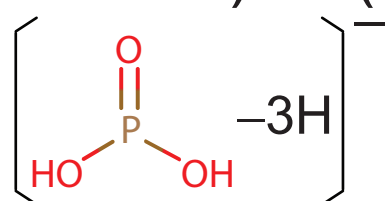

c: rule N4

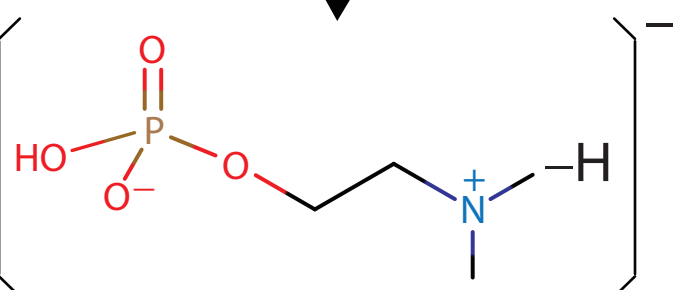

b: rule N4

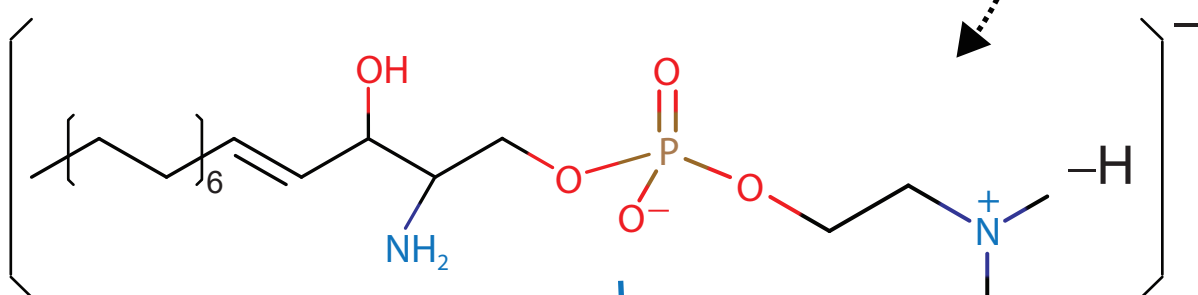

Second bond cleavage

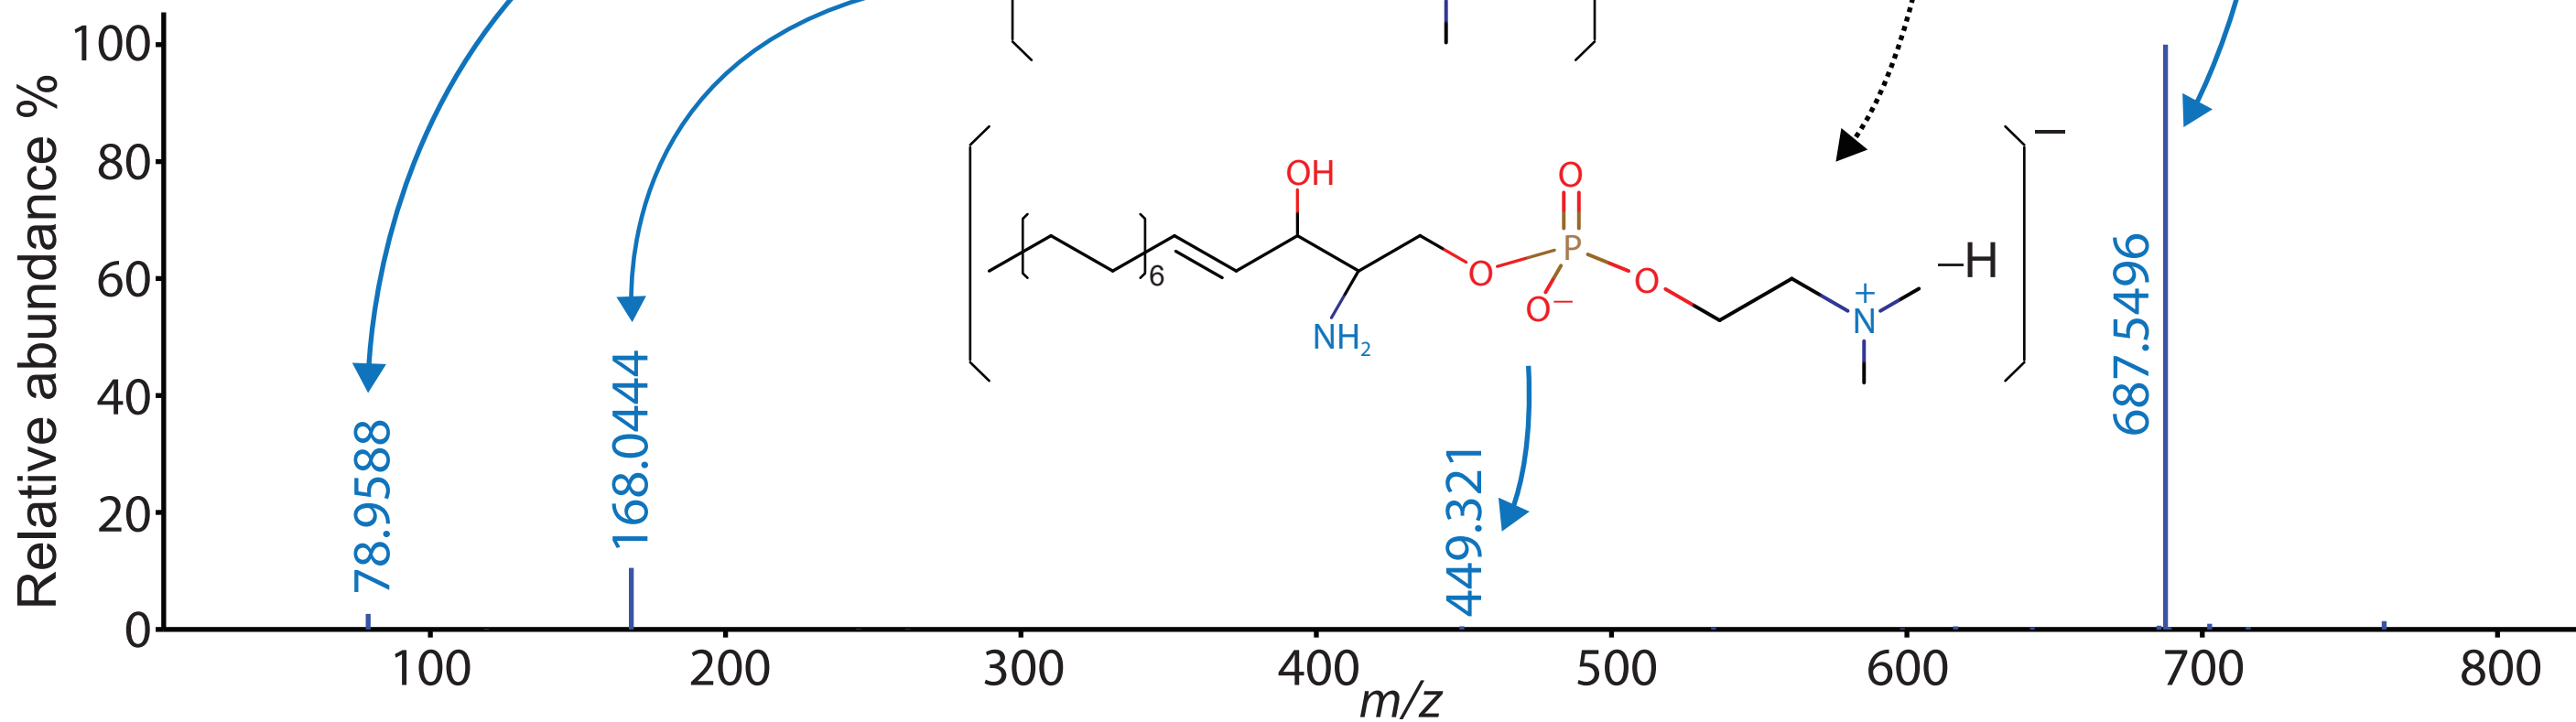

Ceramide [AP] (t18:1/24:0); [M-H]<sup>-</sup>

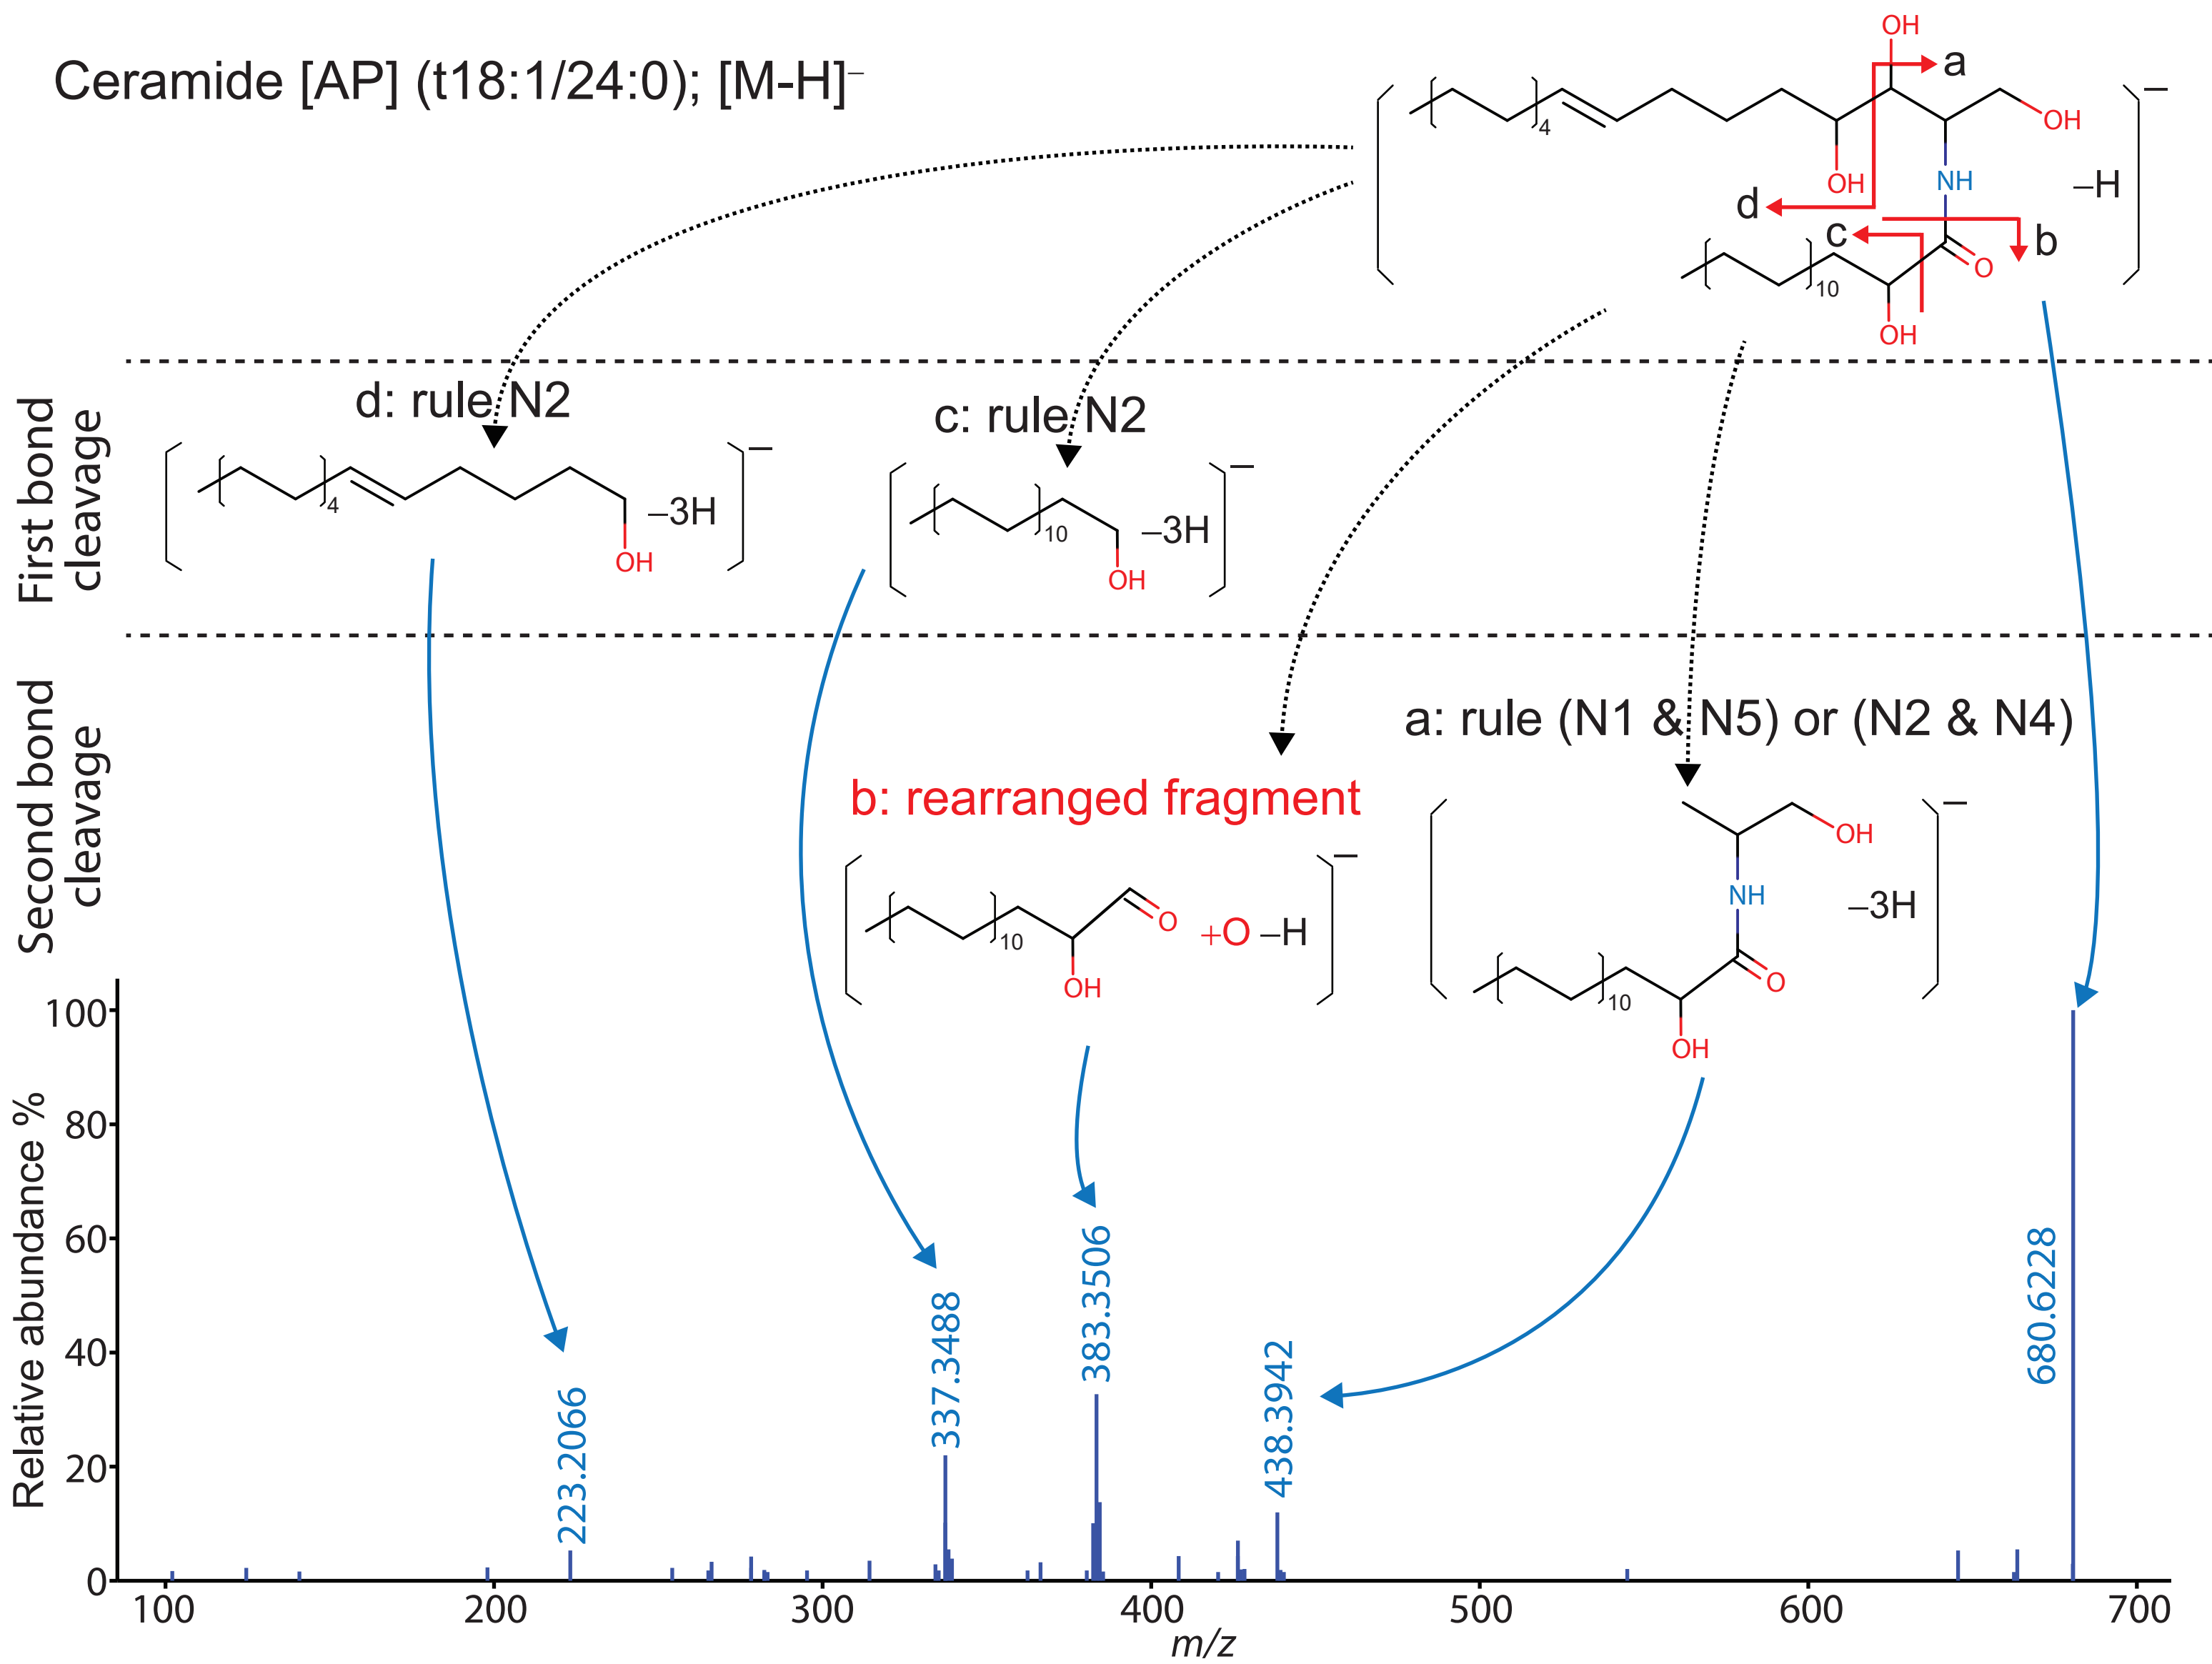

Hex-Ceramide [AP] (t18:1/24:0); [M-H]<sup>-</sup>

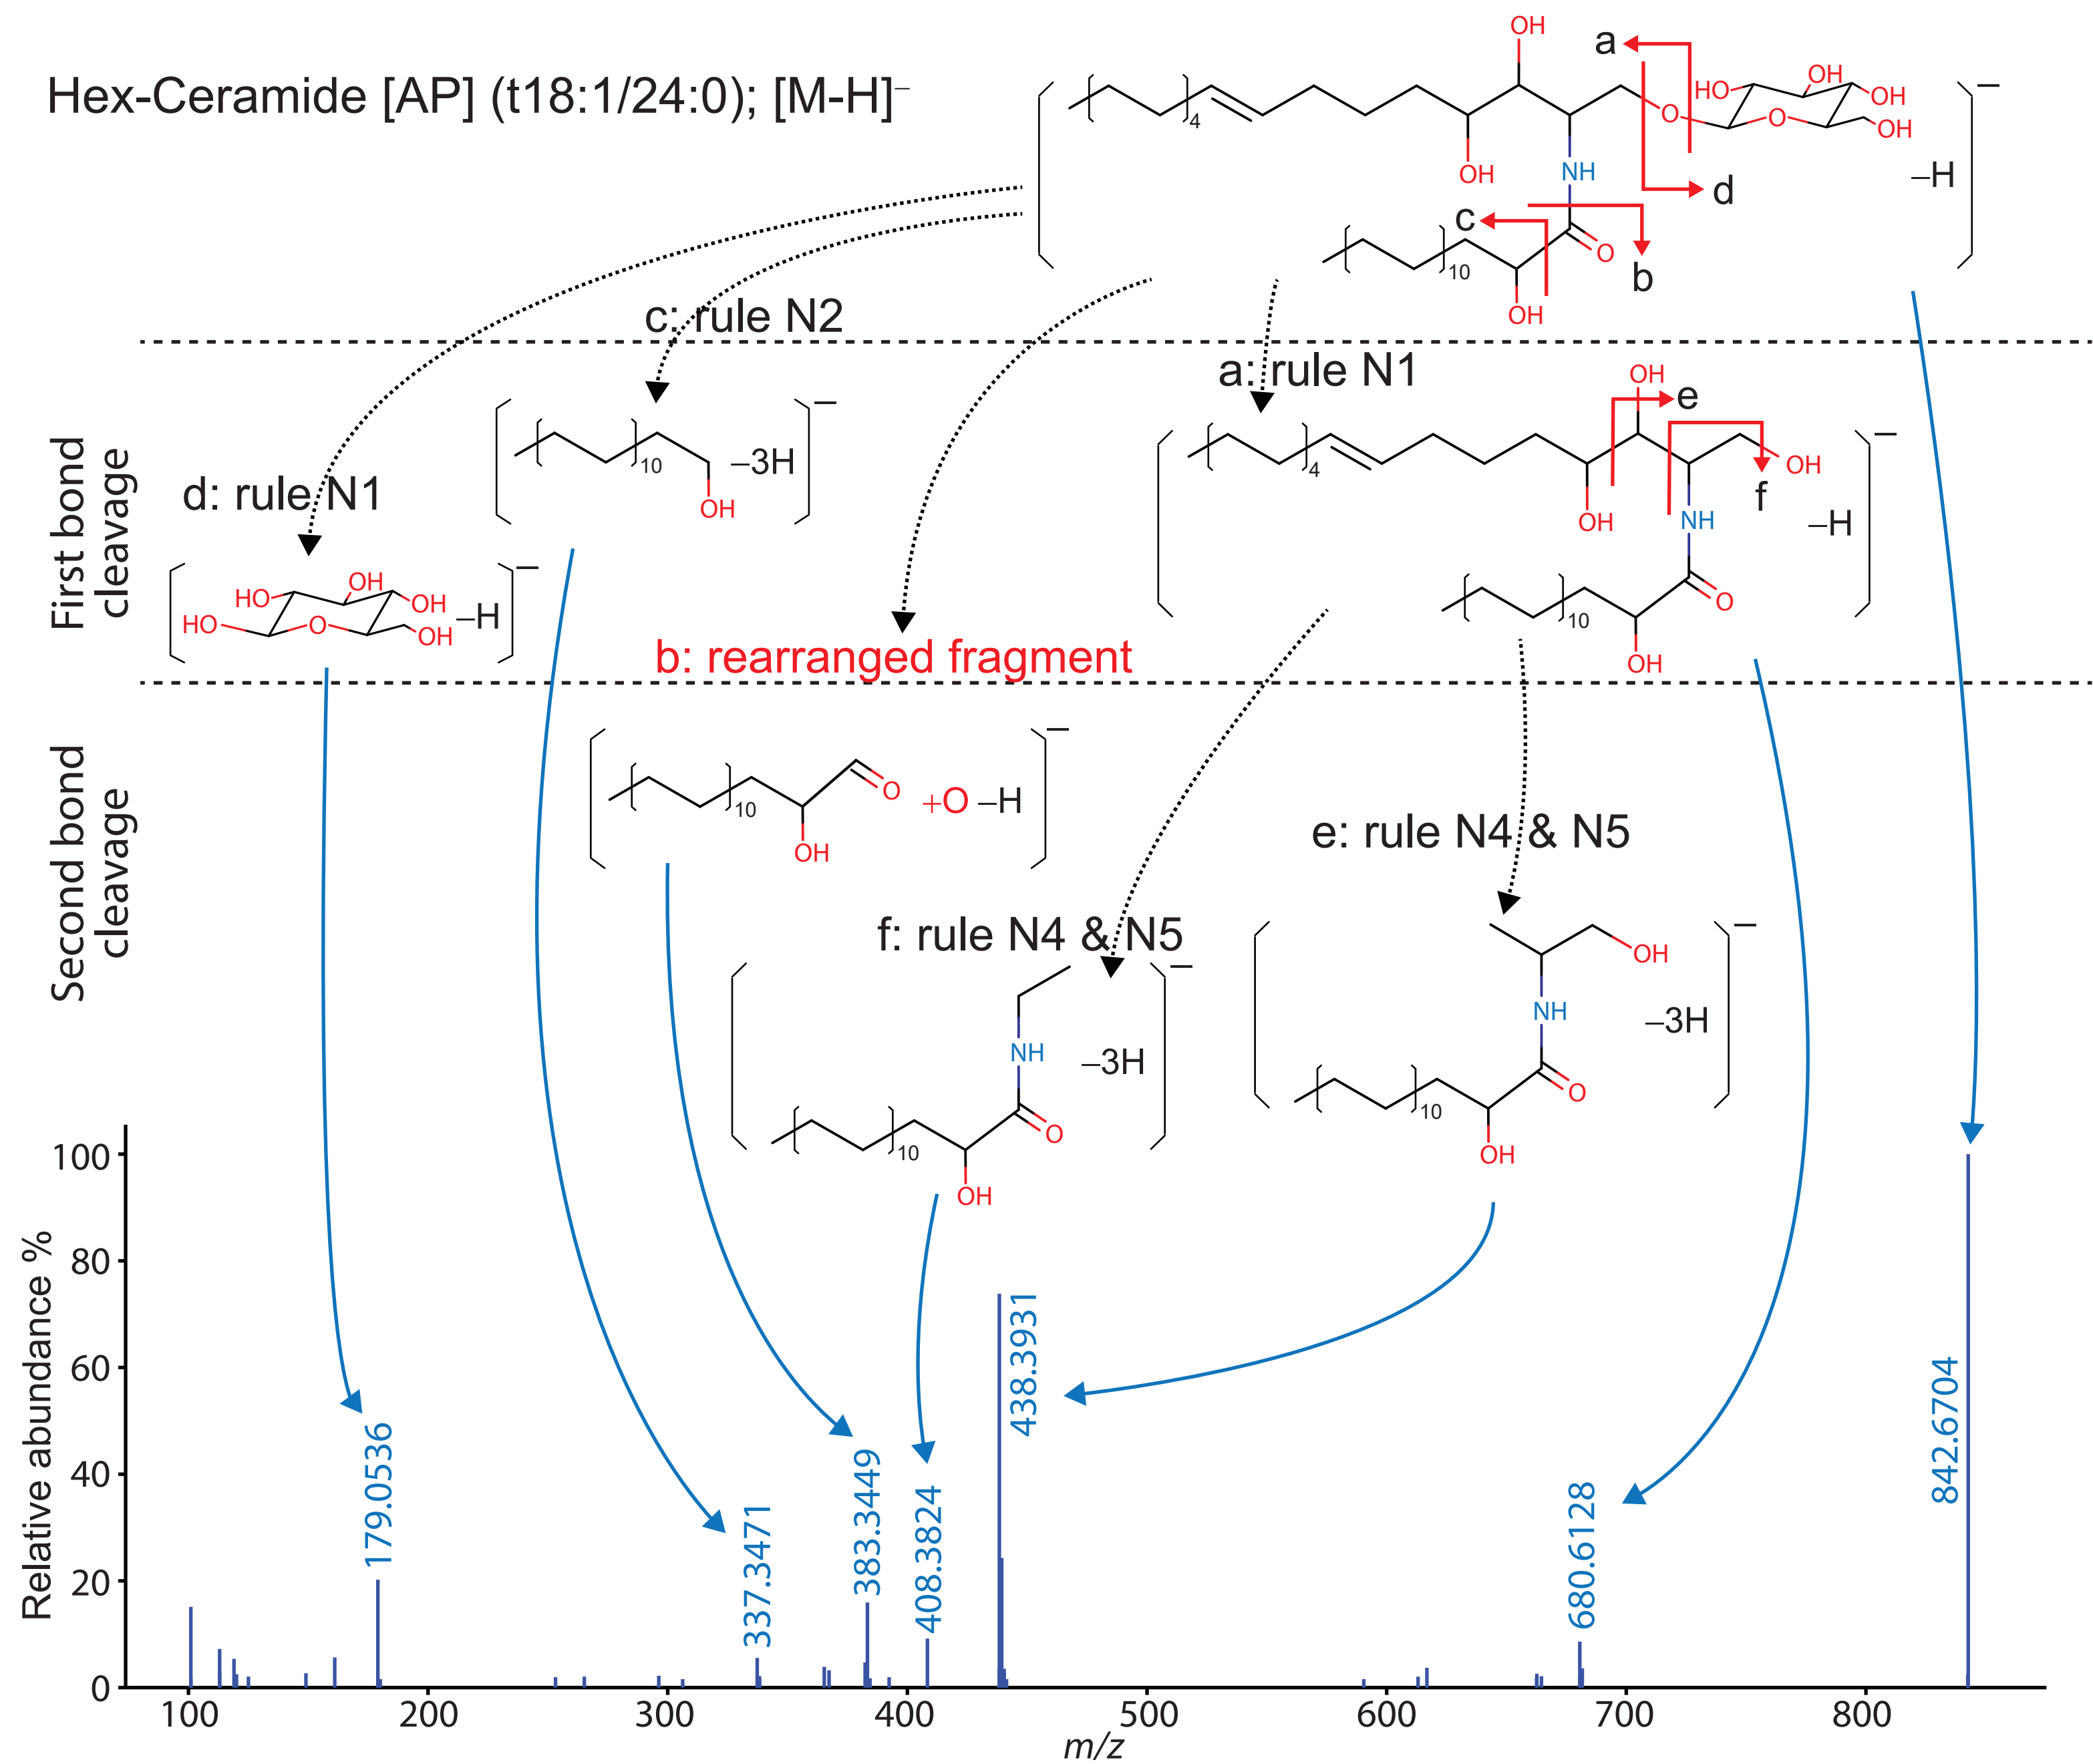

Supplement: 13321_2017_205_MOESM1_ESM.pdf [file 13321_2017_205_MOESM1_ESM.pdf]
