# Supplementary material for: Comprehensive identification of sphingolipid species by in silico retention time and tandem mass spectral library
Source: PubMed Central journal article supplement (PMC5352698; doi:10.1186/s13321-017-0205-3), 2017-03-15

SM(d18:1/16:0); [M+CH<sub>3</sub>COOH-H]<sup>-</sup>;  
Precursor *m/z*: 761.5772

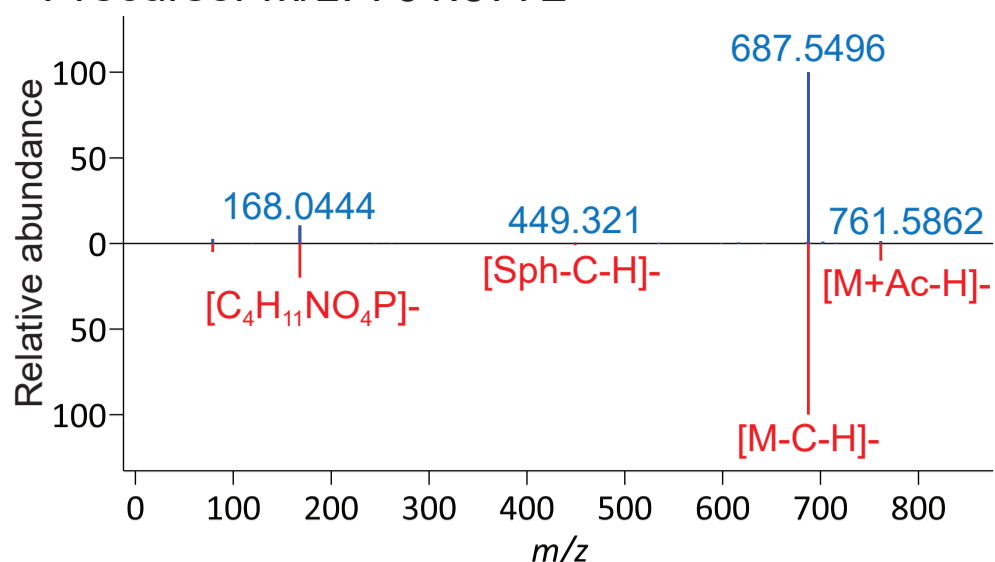

Cer [EOS] (d17:1/32:0-O-18:2); [M+CH<sub>3</sub>COOH-H]<sup>-</sup>;  
Precursor *m/z*: 1084.9771

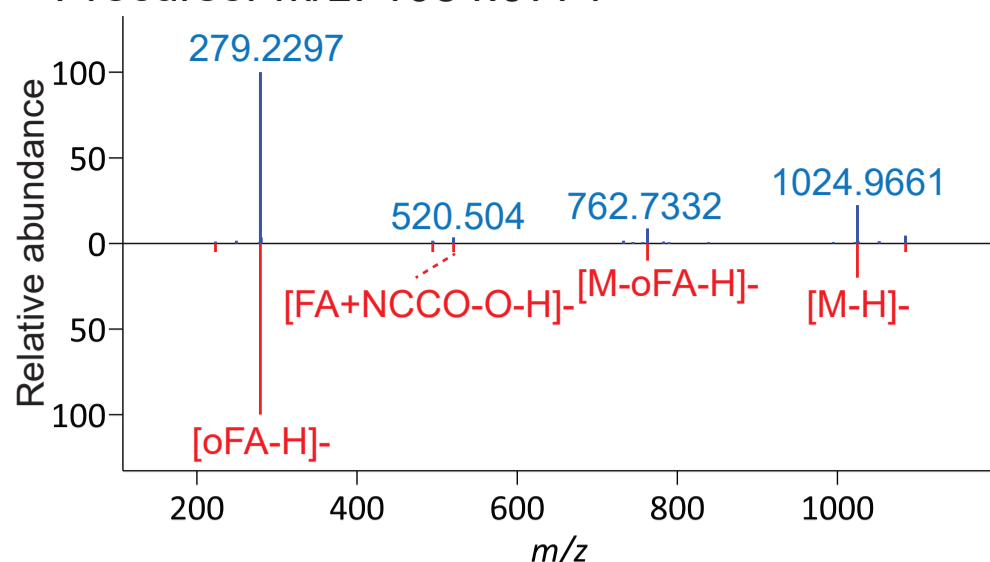

Cer [ADS] (d18:0/16:0); [M+CH<sub>3</sub>COOH-H]<sup>-</sup>;  
Precursor *m/z*: 614.5313

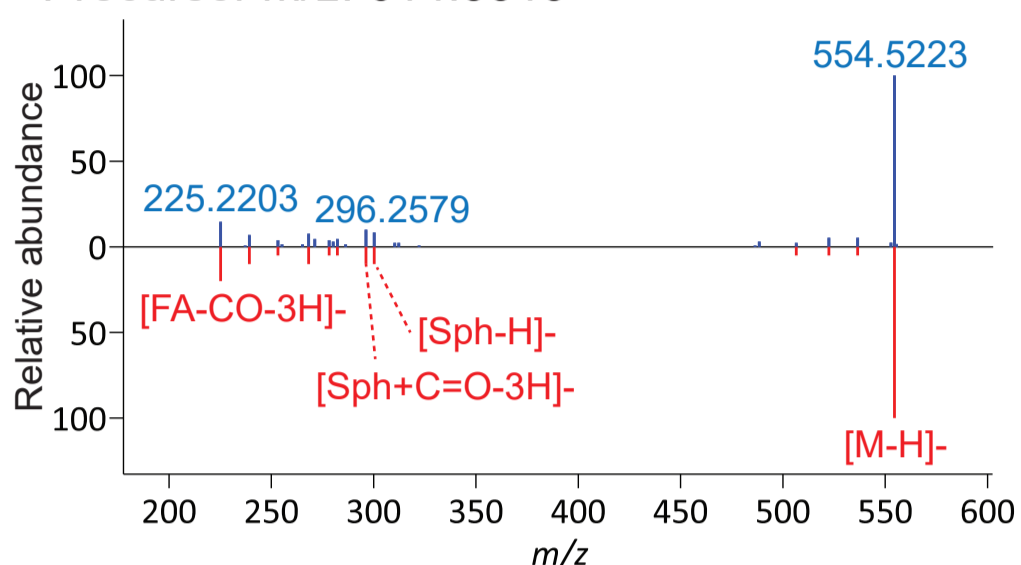

Cer [NDS] (d18:0/26:0); [M+CH<sub>3</sub>COOH-H]<sup>-</sup>;  
Precursor *m/z*: 738.6904

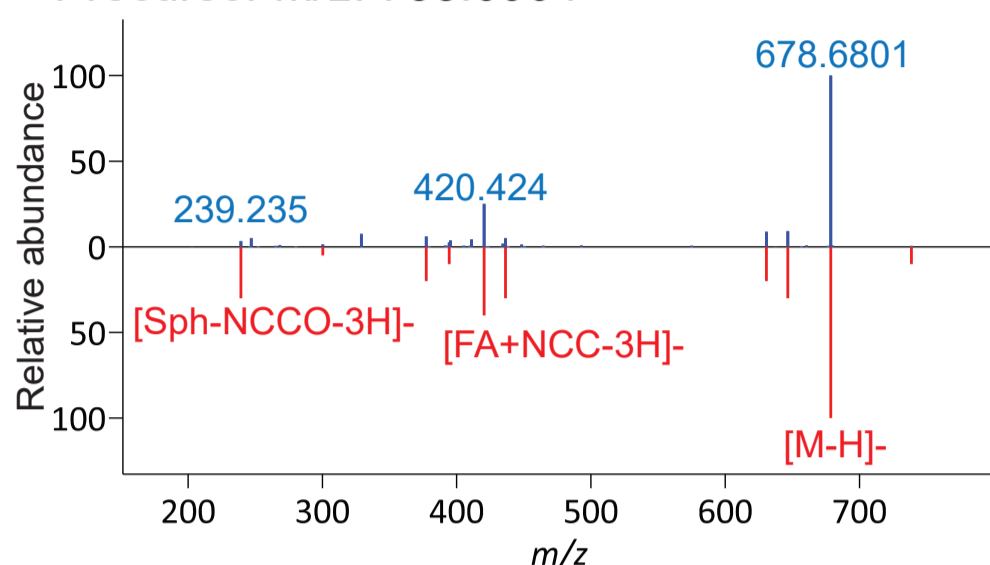

Cer [AS] (d18:1/16:0); [M+CH<sub>3</sub>COOH-H]<sup>-</sup>;  
Precursor *m/z*: 612.5185

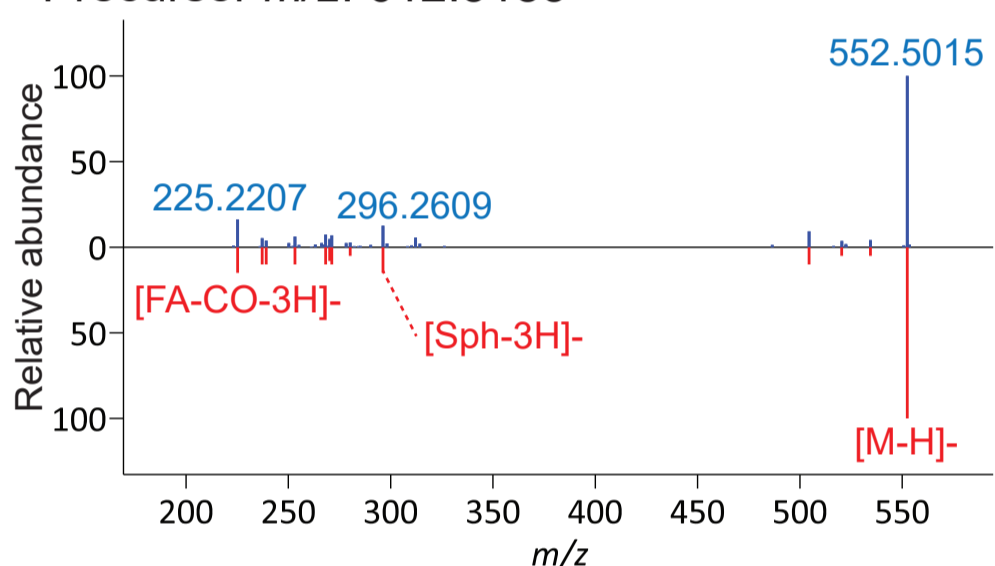

Cer [NS] (d18:1/26:0); [M+CH<sub>3</sub>COOH-H]<sup>-</sup>;  
Precursor *m/z*: 736.6774

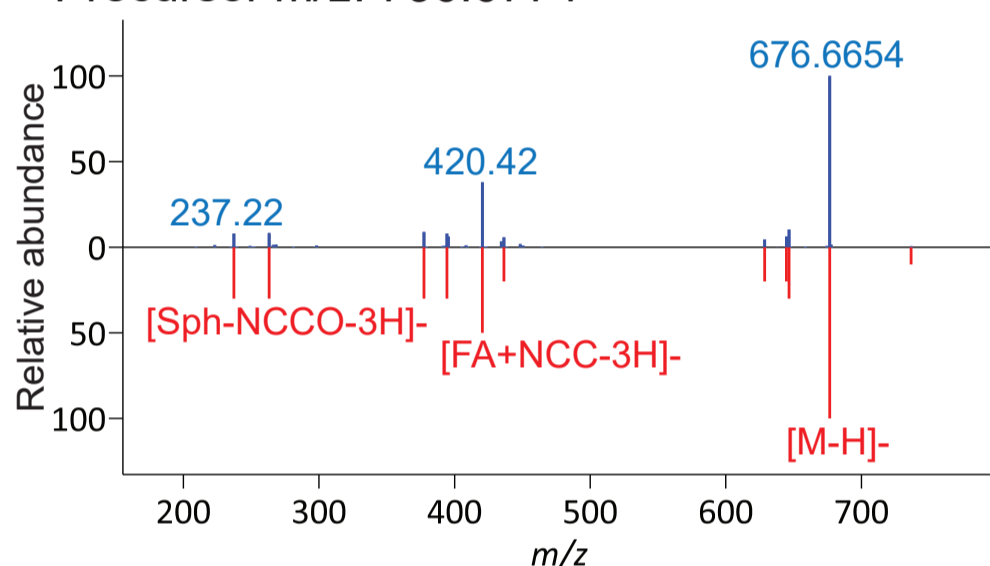

Cer [BDS] (d16:0/26:0); [M+CH<sub>3</sub>COOH-H]<sup>-</sup>;  
Precursor *m/z*: 726.6563

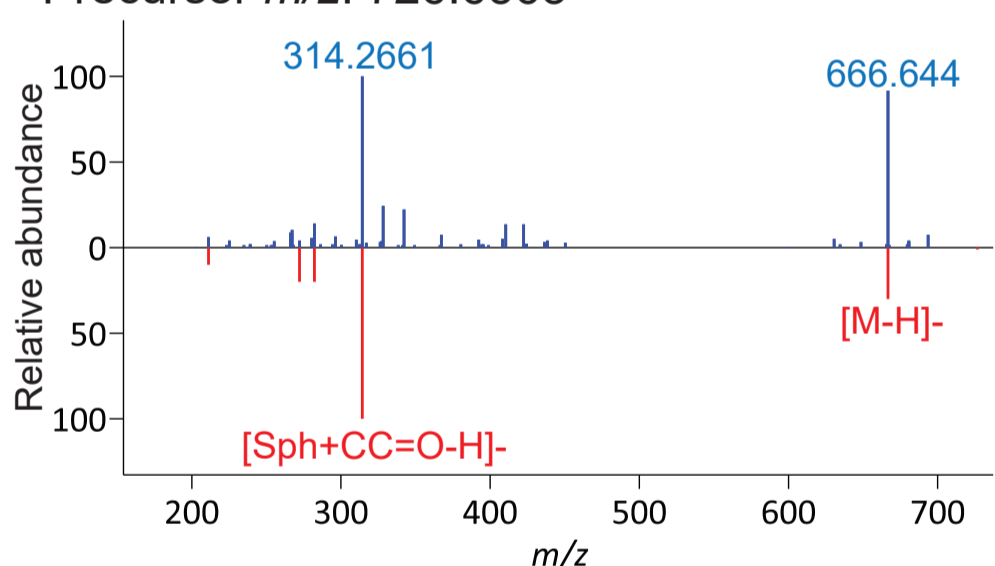

Cer [NP] (t18:0/16:0); [M+CH<sub>3</sub>COOH-H]<sup>-</sup>;  
Precursor *m/z*: 614.5325

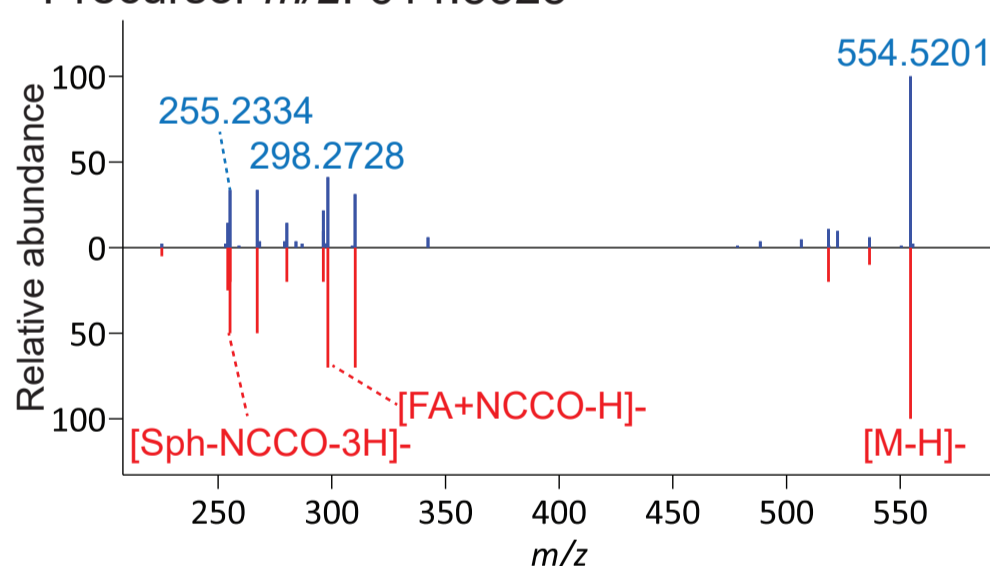

Cer [BS] (d16:1/26:0); [M+CH<sub>3</sub>COOH-H]<sup>-</sup>;  
Precursor *m/z*: 724.655

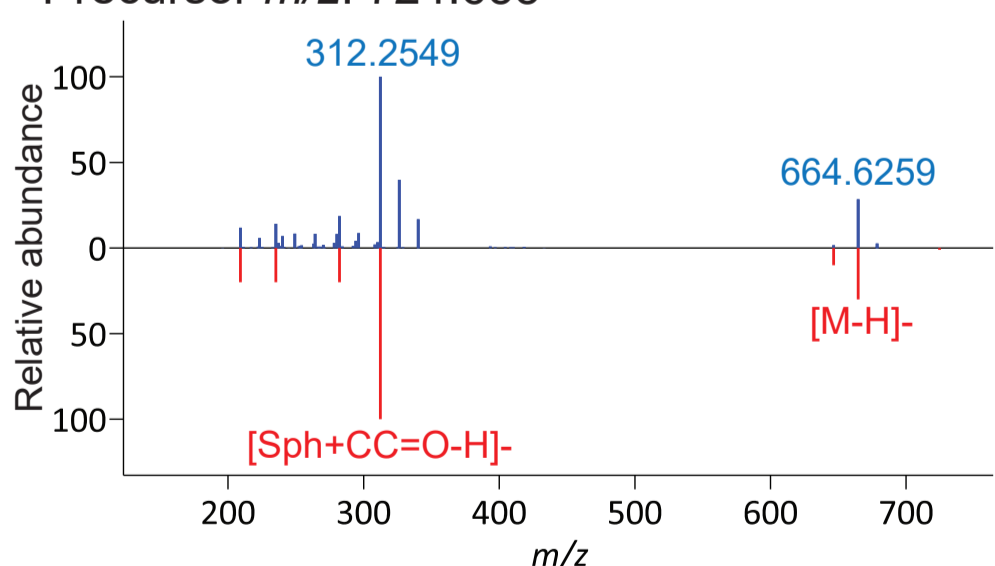

GlcCer [NS] (d18:1/24:0); [M+CH<sub>3</sub>COOH-H]<sup>-</sup>;  
Precursor *m/z*: 870.6975

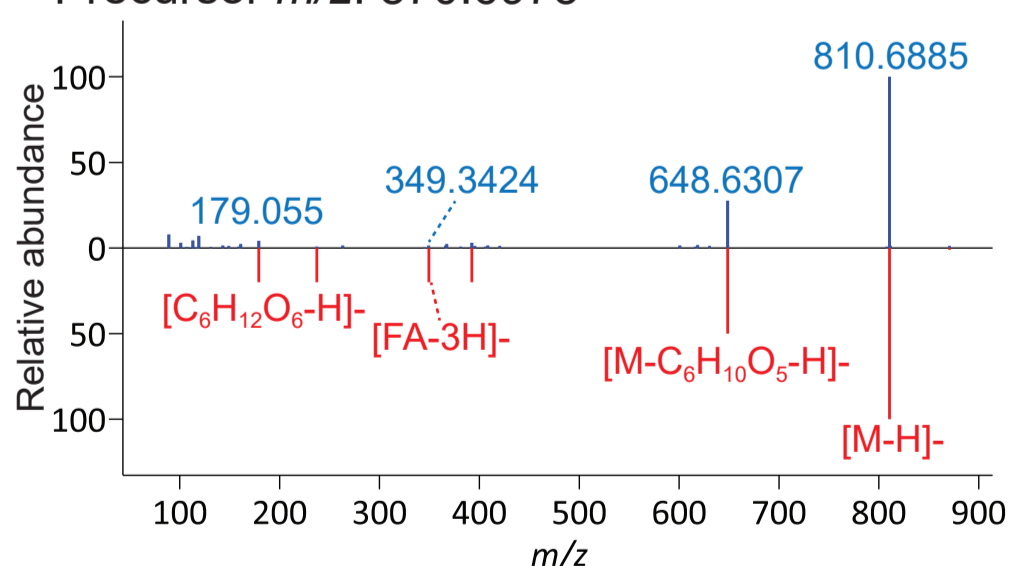

Cer [AP] (t18:1/24:0); [M-H]<sup>-</sup>;  
Precursor *m/z*: 680.6229

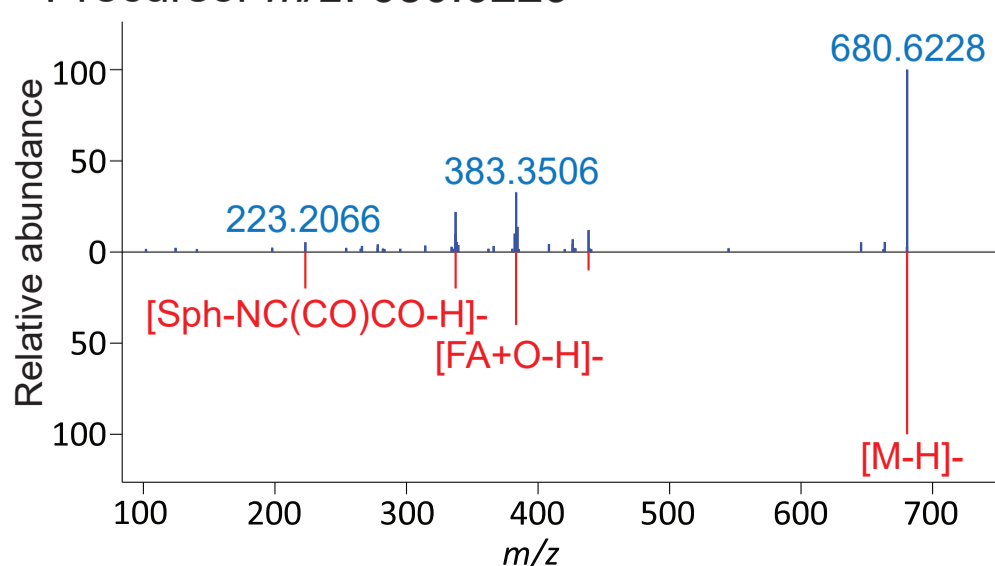

GlcCer [AP] (t18:1/24:0); [M-H]<sup>-</sup>;  
Precursor *m/z*: 842.6671

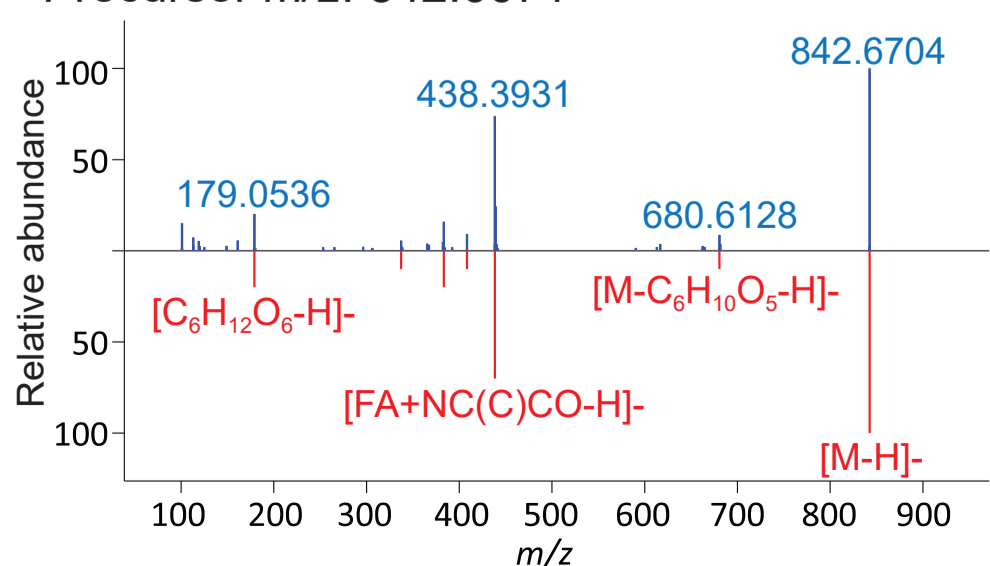

LysoPC 18:2; [M+CH<sub>3</sub>COOH-H]<sup>-</sup>  
Precursor *m/z*: 578.344

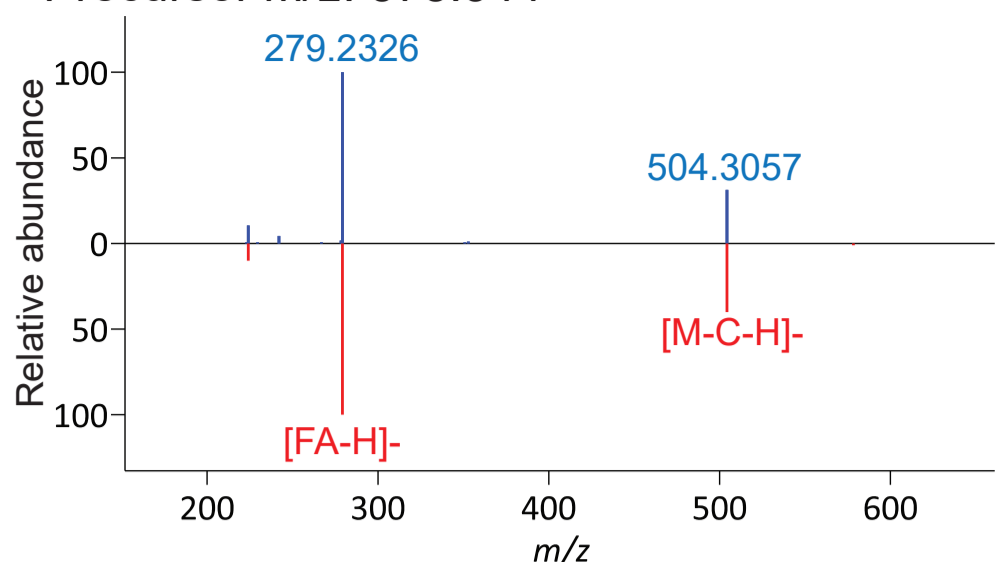

PI(18:0/16:1); [M-H]<sup>-</sup>  
Precursor *m/z*: 835.5283

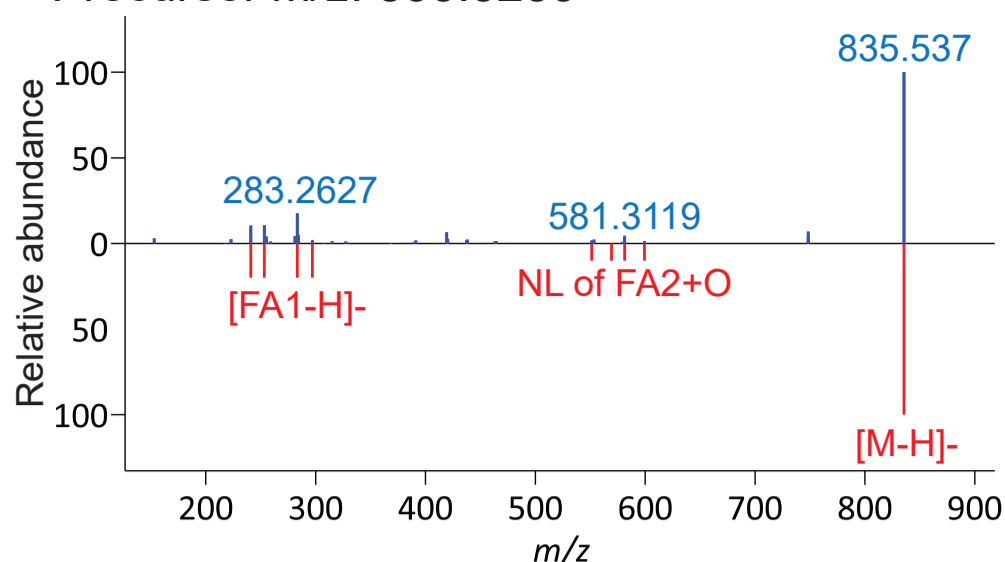

LysoPE 18:1; [M-H]<sup>-</sup>  
Precursor *m/z*: 478.2894

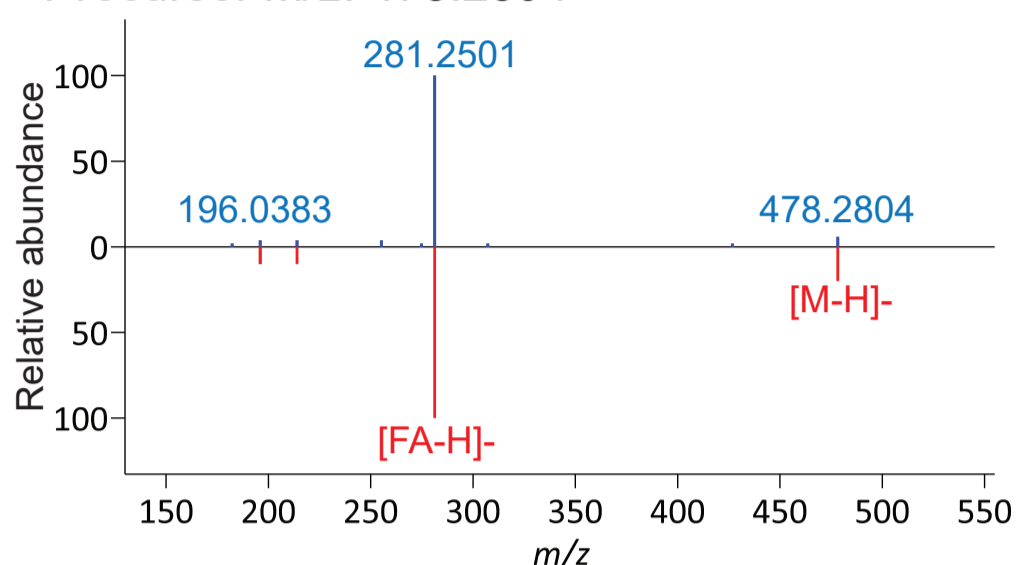

PS(18:0/22:5); [M-H]<sup>-</sup>  
Precursor *m/z*: 836.5422

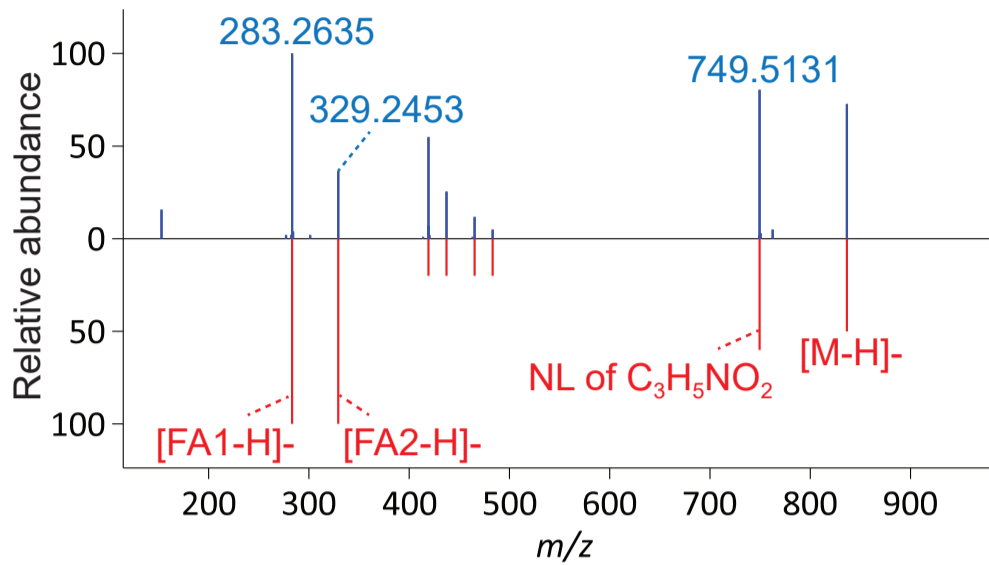

PC(16:0/20:4); [M+CH<sub>3</sub>COOH-H]<sup>-</sup>  
Precursor *m/z*: 840.5733

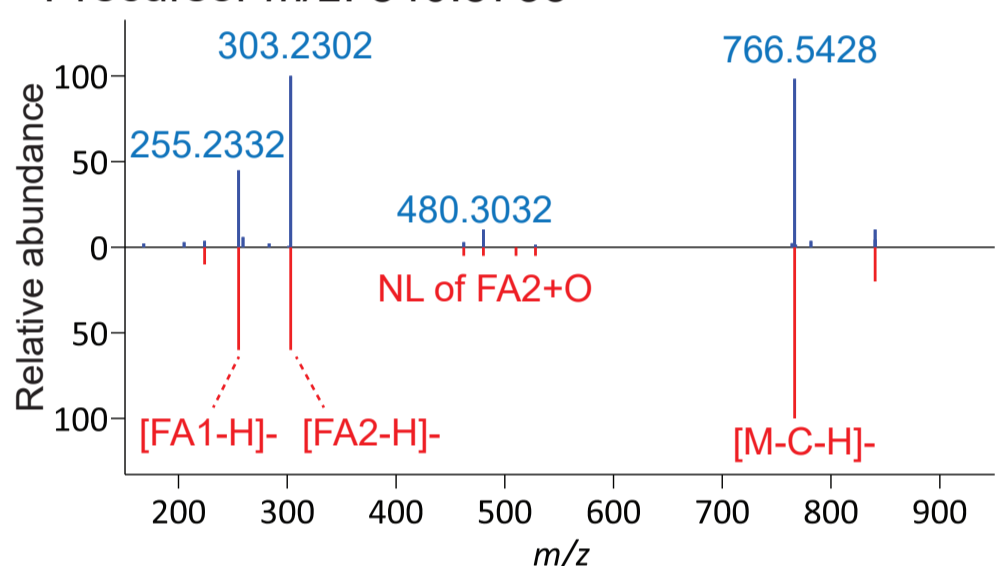

PC(e18:1/16:0); [M+CH<sub>3</sub>COOH-H]<sup>-</sup>  
Precursor *m/z*: 804.6132

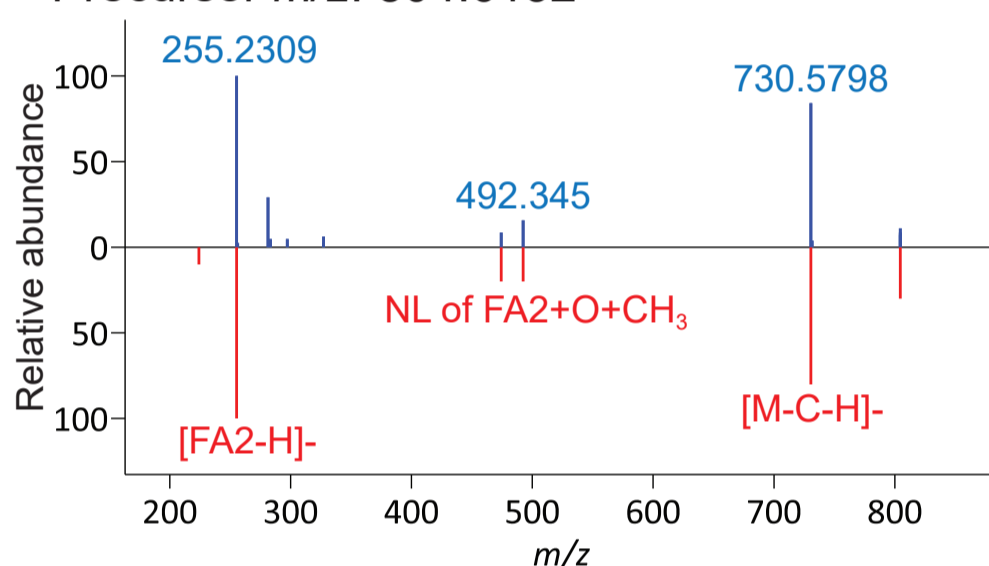

PE(18:0/22:4); [M-H]<sup>-</sup>  
Precursor *m/z*: 794.5637

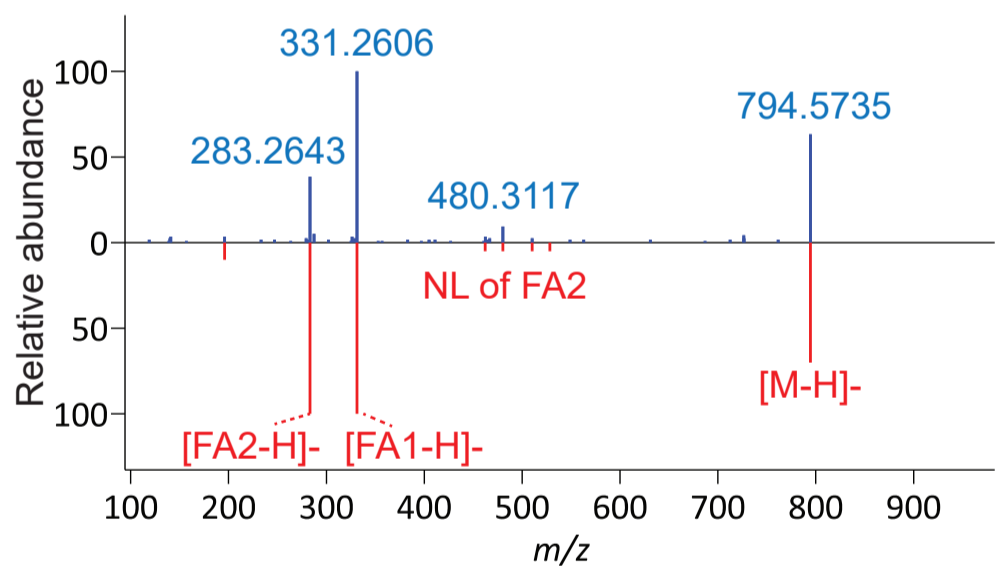

PE(e18:1/20:4); [M-H]<sup>-</sup>  
Precursor *m/z*: 750.5384

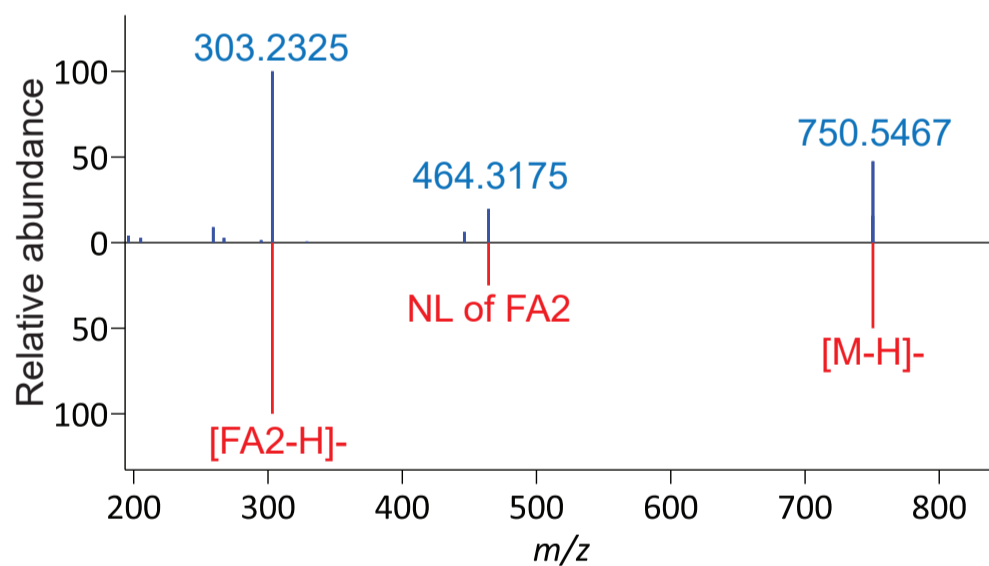

PG(16:0/18:1); [M-H]<sup>-</sup>  
Precursor *m/z*: 747.5227

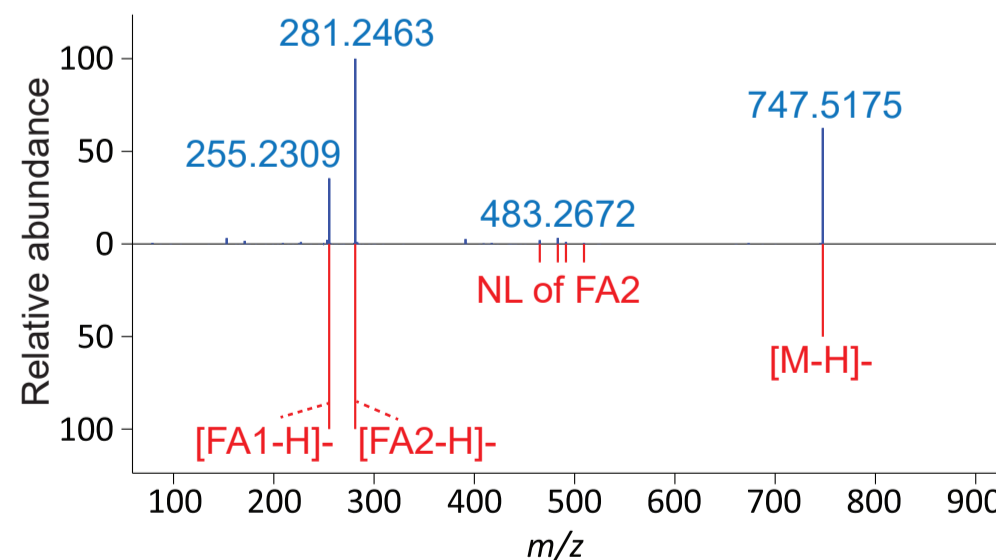

Supplement: 13321_2017_205_MOESM4_ESM.pdf [file 13321_2017_205_MOESM4_ESM.pdf]
