# Supplementary material for: Comprehensive identification of sphingolipid species by in silico retention time and tandem mass spectral library
Source: PubMed Central journal article supplement (PMC5352698; doi:10.1186/s13321-017-0205-3), 2017-03-15

Ceramide [BS] (d17:1/24:0); [M+H]<sup>+</sup>  
RT=13.127 min, *m/z*=652.6163

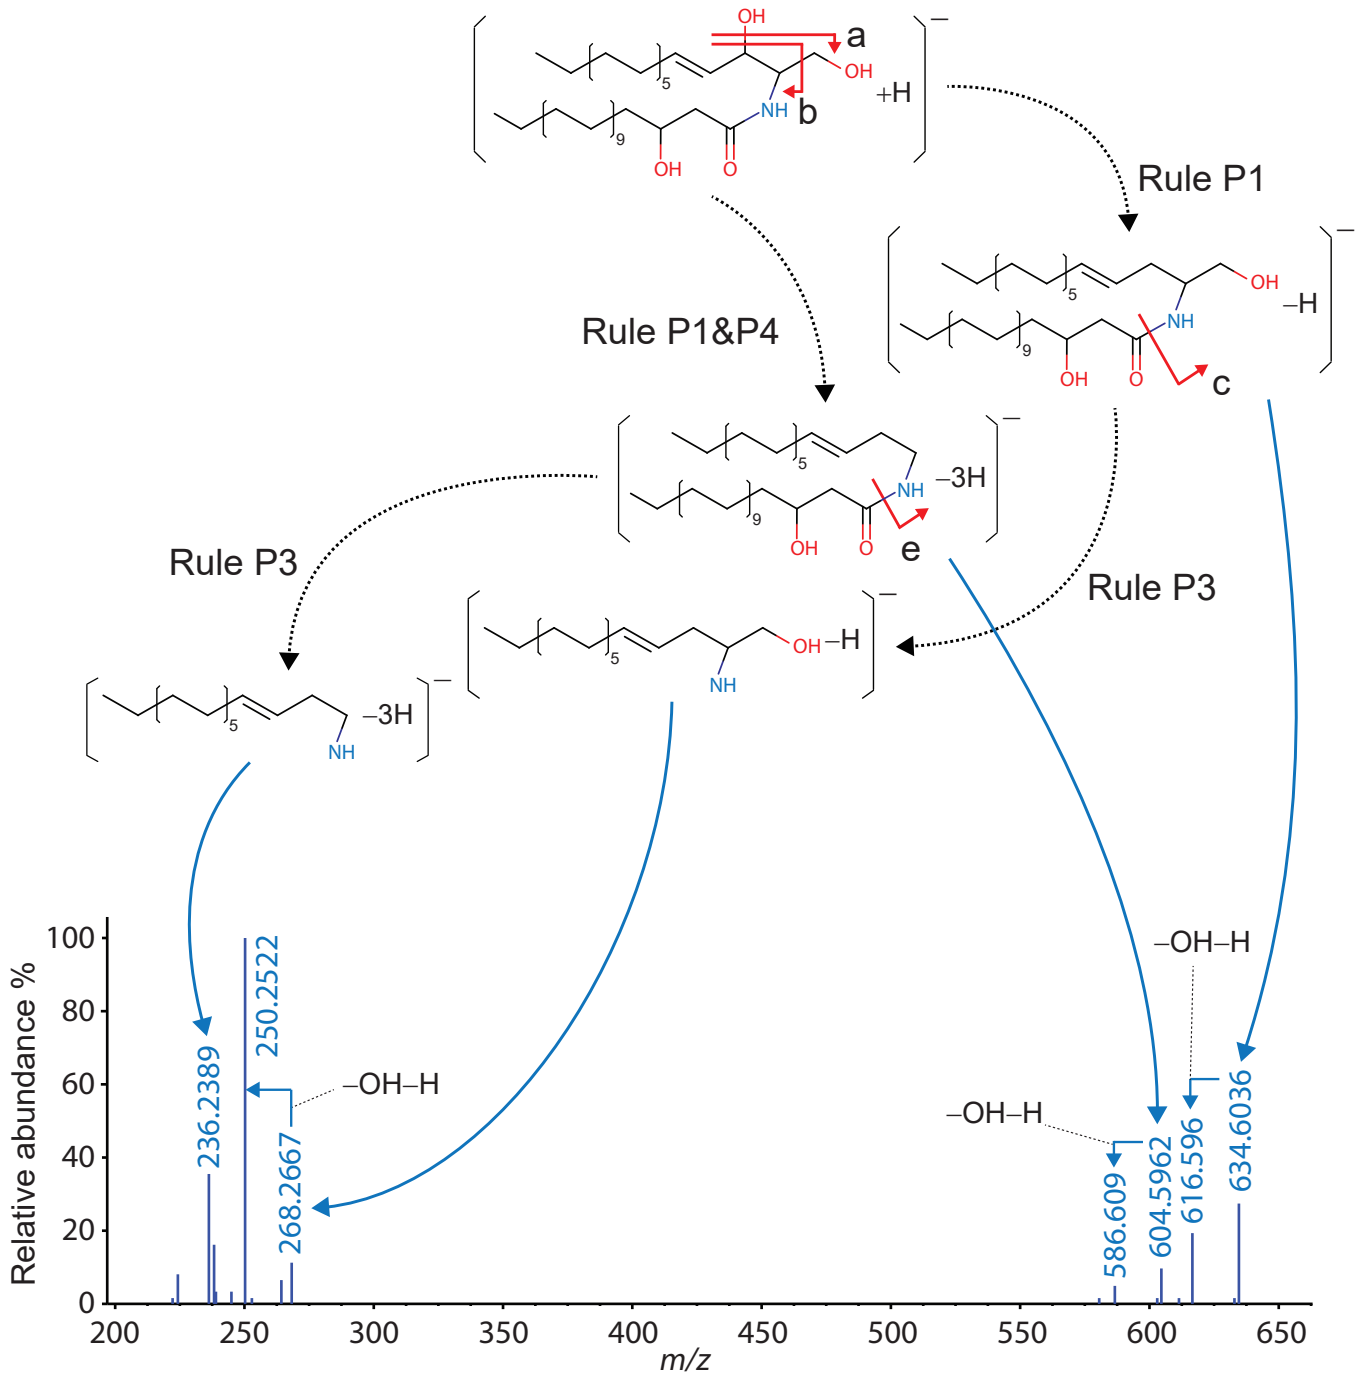

Supplement: 13321_2017_205_MOESM3_ESM.pdf [file 13321_2017_205_MOESM3_ESM.pdf]
