# Supplementary material for: Comprehensive identification of sphingolipid species by in silico retention time and tandem mass spectral library
Source: PubMed Central journal article supplement (PMC5352698; doi:10.1186/s13321-017-0205-3), 2017-03-15
Supplement: 13321_2017_205_MOESM5_ESM.pdf [file 13321_2017_205_MOESM5_ESM.pdf]

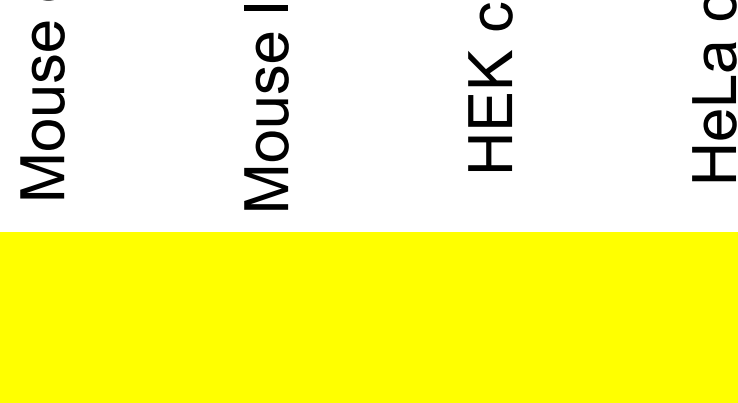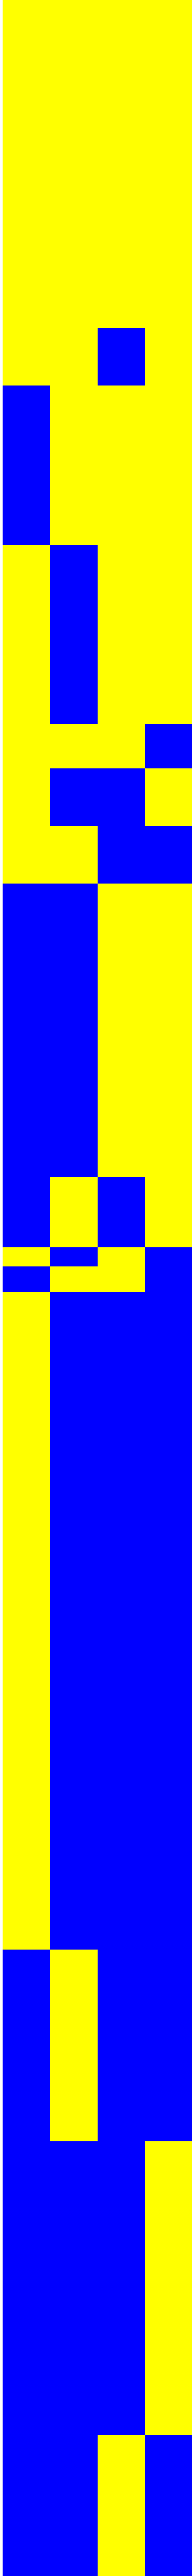

- Cer [NS] (d18:1/18:0)
- Cer [NS] (d18:1/16:0)
- Cer [NS] (d18:1/24:1)
- Cer [NS] (d18:2/24:1)
- FA 16:0
- FA 16:1
- FA 18:0
- FA 18:1
- FA 18:2
- FA 20:1
- FA 20:4
- HexCer [NS] (d18:1/16:0)
- HexCer [NS] (d18:1/22:0)
- HexCer [NS] (d18:1/24:1)
- HexCer [NS] (d18:1/24:1)
- lysoPC 16:0
- lysoPC 18:0
- lysoPC 18:1
- lysoPE 16:0
- lysoPE 18:0
- lysoPE 18:1
- PC(16:0/16:0)
- PC(16:0/16:1)
- PC(16:0/18:0)
- PC(16:0/18:1)
- PC(16:0/18:1)
- PC(16:0/20:4)
- PC(18:0/18:1)
- PC(18:1/18:2)
- PC(18:1/22:6)
- PE(16:0/18:1)
- PE(16:0/20:4)
- PE(18:0/18:1)
- PE(18:0/20:3)
- PE(18:0/20:4)
- PE(18:0/22:5)
- PE(18:0/22:6)
- PE(18:1/18:2)
- PE(18:1/20:4)
- PE(e16:1/20:4)
- PE(e16:1/22:5)
- PE(e16:1/22:6)
- PE(e18:1/20:4)
- PE(e18:1/22:6)
- PG(16:0/18:1)
- PG(18:1/18:1)
- PG(18:1/18:2)
- PG(18:1/22:6)
- PG(18:2/22:6)
- PG(22:6/22:6)
- PI(16:0/20:4)
- PI(17:0/20:4)
- PI(18:0/20:4)
- PI(18:0/22:6)
- PI(18:1/18:1)
- PI(18:1/18:2)
- SM(d18:1/16:0)
- SM(d18:1/24:1)
- Cer [NS] (d17:1/22:0)
- Cer [NDS] (d18:0/16:0)
- Cer [NS] (d18:1/20:0)
- FA 16:3
- IsoPC 18:2
- PC(18:0/20:4)
- PC(18:1/20:4)
- PE(16:0/18:2)
- PI(18:1/20:4)
- Cer [NS] (d18:1/22:0)
- Cer [NP] (t18:0/24:0)
- Cer [NS] (d18:1/23:0)
- Cer [NS] (d18:1/24:0)
- Cer [NS] (d18:1/25:0)
- Cer [NS] (d18:2/25:0)
- FA 20:3
- FA 20:5
- FA 22:5
- PC(16:0/17:1)
- PC(16:0/20:5)
- PC(16:1/20:5)
- PC(18:1/20:3)
- PE(16:0/16:1)
- PE(16:0/20:5)
- PE(18:0/20:5)
- PE(18:1/20:5)
- PE(e16:1/20:5)
- PI(16:0/18:1)
- PI(16:0/20:5)
- PI(18:0/22:5)
- PI(18:1/20:3)
- PI(18:1/22:6)
- PS(18:0/22:6)
- SM(d18:1/24:0)
- FA 17:0
- Cer [NS] (d18:1/26:0)
- FA 20:0
- FA 22:0
- FA 22:1
- PC(15:0/16:0)
- PC(16:1/16:1)
- PC(16:1/18:1)
- PC(17:0/18:1)
- PC(17:1/18:1)
- PC(18:1/18:1)
- PE(16:1/18:1)
- PE(17:1/18:1)
- PE(18:1/18:1)
- PE(18:1/20:1)
- PE(e16:1/16:1)
- PE(e16:1/18:1)
- PE(e16:1/22:4)
- PE(e18:1/18:1)
- PI(16:0/16:1)
- PI(16:1/16:1)
- PI(16:1/18:1)
- PI(18:0/18:1)
- PI(18:0/20:1)
- PS(18:0/18:1)
- PS(18:0/20:3)
- PS(18:0/20:4)
- PS(18:1/18:1)
- PC(16:0/22:6)
- HexCer [NS] (d18:1/24:0)
- PC(16:1/18:2)
- PC(18:0/22:6)
- PE(16:0/22:6)
- PE(18:1/22:6)
- PI(16:0/22:6)
- Cer [NS] (d17:1/16:0)
- Cer [NDS] (d18:0/18:0)
- FA 19:0
- FA 21:0
- PE(17:0/18:1)
- PE(e16:1/18:2)
- PI(18:0/22:4)
- PS(16:0/18:1)
- PS(16:1/18:2)
- PC(16:0/18:2)
- Cer [NS] (d17:1/24:0)
- PC(17:0/18:2)
- PC(18:0/18:2)
- PC(18:2/18:2)
- PE(16:1/18:2)
- PE(18:2/18:2)
- PG(18:2/18:2)
- Cer [NS] (d18:1/17:0)
- Cer [NS] (d18:1/14:0)
- Cer [NS] (d18:1/25:1)
- Cer [NS] (d18:1/26:1)
- Cer [NS] (d18:2/14:0)
- Cer [NS] (d18:2/16:0)
- Cer [NS] (d18:2/18:0)
- FA 17:1
- FA 20:2
- HexCer [NS] (d18:2/24:1)
- lysoPC 14:0
- lysoPC 16:1
- PC(14:0/14:0)
- PC(16:1/17:1)
- PC(18:1/20:1)
- PC(18:1/22:5)
- PC(e16:1/16:0)
- PC(e16:1/18:1)
- PC(e16:1/18:1)
- PC(e18:1/16:1)
- PC(e18:1/18:1)
- PE(16:1/16:1)
- PE(18:1/22:1)
- PE(18:1/22:5)
- PE(18:1/24:1)
- PE(22:0/18:1)
- PE(24:0/18:1)
- PE(e16:1/20:3)
- PE(e16:1/22:1)
- PE(e16:1/22:2)
- PE(e18:1/22:1)
- PG(16:0/16:0)
- PG(16:0/16:1)
- PG(16:1/18:1)
- PG(18:0/18:1)
- PG(18:1/20:2)
- PI(16:0/16:0)
- PI(16:0/17:1)
- PI(18:0/20:2)
- PI(18:1/20:5)
- PI(18:1/22:5)
- PS(16:0/16:1)
- PS(16:1/18:1)
- PS(18:0/22:5)
- SM(d18:1/14:0)
- SM(d18:2/16:0)
- FA 22:6
- Cer [NS] (d18:1/22:1)
- lysoPC 20:4
- lysoPE 20:4
- PC(16:0/18:3)
- PC(18:0/20:5)
- PE(17:0/20:4)
- PG(18:1/22:5)
- SM(d18:1/23:0)
- SM(d18:2/24:1)
- PC(e16:1/20:4)
- PC(14:0/16:0)
- PE(18:0/22:4)
- PI(16:0/20:3)
- PI(18:0/20:3)
- PI(18:0/20:3)
- SM(d18:1/22:0)
- Cer [ADS] (d17:0/15:0)
- Cer [ADS] (d16:0/16:0)
- Cer [ADS] (d17:0/16:0)
- Cer [ADS] (d17:0/26:0)
- Cer [ADS] (d18:0/16:0)
- Cer [ADS] (d18:0/26:0)
- Cer [AP] (t16:0/26:1)
- Cer [AP] (t17:0/16:0)
- Cer [AP] (t17:0/25:1)
- Cer [AP] (t17:0/26:1)
- Cer [AP] (t18:0/16:0)
- Cer [AP] (t18:0/17:0)
- Cer [AP] (t18:0/18:0)
- Cer [AP] (t18:0/20:0)
- Cer [AP] (t18:0/22:0)
- Cer [AP] (t18:0/25:1)
- Cer [AP] (t18:0/26:1)
- Cer [AS] (d16:1/16:0)
- Cer [AS] (d16:1/26:0)
- Cer [AS] (d17:1/16:0)
- Cer [AS] (d17:1/26:0)
- Cer [AS] (d18:1/16:0)
- Cer [AS] (d18:1/18:0)
- Cer [AS] (d18:1/26:0)
- Cer [BDS] (d16:0/26:0)
- Cer [BDS] (d17:0/24:0)
- Cer [BDS] (d17:0/26:0)
- Cer [BDS] (d18:0/26:0)
- Cer [BS] (d16:1/24:0)
- Cer [BS] (d17:1/16:0)
- Cer [BS] (d17:1/24:0)
- Cer [BS] (d17:1/28:0)
- Cer [BS] (d18:1/16:0)
- Cer [BS] (d18:1/26:0)
- Cer [EOS] (d16:1/32:0-O-18:2)
- Cer [EOS] (d17:1/32:0-O-18:2)
- Cer [EOS] (d17:1/33:0-O-18:2)
- Cer [EOS] (d17:1/33:0-O-18:2)
- Cer [EOS] (d17:1/34:0-O-18:2)
- Cer [EOS] (d18:1/34:0-O-18:2)
- Cer [EOS] (d18:1/36:0-O-18:2)
- Cer [EOS] (d18:1/36:0-O-18:2)
- Cer [EOS] (d18:1/36:2-O-18:2)
- Cer [EOS] (d20:2/25:0-O-18:2)
- Cer [NDS] (d16:0/25:0)
- Cer [NDS] (d16:0/26:0)
- Cer [NDS] (d17:0/24:0)
- Cer [NDS] (d17:0/26:0)
- Cer [NDS] (d17:0/28:0)
- Cer [NDS] (d18:0/24:0)
- Cer [NDS] (d18:0/26:0)
- Cer [NDS] (d18:0/28:0)
- Cer [NDS] (d20:0/18:0)
- Cer [NP] (t18:0/16:0)
- Cer [NP] (t18:0/17:0)
- Cer [NP] (t18:0/20:0)
- Cer [NS] (d16:1/24:0)
- Cer [NS] (d16:1/26:0)
- Cer [NS] (d17:1/18:0)
- Cer [NS] (d17:1/26:0)
- Cer [NS] (d17:1/30:0)
- Cer [NS] (d17:1/32:0)
- Cer [NS] (d18:1/28:0)
- Cer [NS] (d18:1/30:0)
- Cer [NS] (d18:1/36:1)
- HexCer [NDS] (d16:0/28:0)
- HexCer [NDS] (d17:0/26:0)
- HexCer [NDS] (d18:0/20:1)
- HexCer [NDS] (d18:0/26:0)
- HexCer [NS] (d17:1/26:0)
- HexCer [NS] (d18:1/18:0)
- HexCer [NS] (d18:1/20:0)
- HexCer [NS] (d18:1/24:2)
- HexCer [NS] (d18:1/26:0)
- HexCer [NS] (d20:1/22:0)
- HexCer [NS] (d20:2/22:0)
- lysoPC 22:0
- lysoPC 23:0
- lysoPC 24:0
- PC(15:0/18:1)
- PC(18:2/20:2)
- PC(20:1/18:2)
- PC(22:0/18:1)
- PC(22:0/18:2)
- PC(24:0/18:1)
- PC(24:0/18:2)
- PC(e18:1/16:0)
- PC(e18:1/20:4)
- PE(18:2/22:6)
- PE(22:0/20:4)
- PE(24:0/20:4)
- PE(e18:1/18:2)
- PE(e20:1/20:4)
- PI(17:0/18:2)
- PI(18:0/18:1)
- PI(18:0/18:2)
- PS(16:0/18:2)
- PS(18:0/18:2)
- PS(18:1/20:4)
- PS(24:0/18:1)
- SM(d17:1/16:0)
- Cer [NS] (d17:1/24:1)
- Cer [AP] (t18:1/18:4)
- lysoPE 22:6
- PC(14:0/18:2)
- PC(15:0/18:2)
- PC(15:0/22:6)
- PC(16:0/20:3)
- PC(16:1/22:6)
- PC(18:2/18:3)
- PC(18:2/20:4)
- PC(19:0/18:2)
- PC(20:0/18:2)
- PC(20:1/20:4)
- PE(15:0/22:6)
- PE(16:1/22:6)
- PE(17:0/18:2)
- PE(17:1/22:6)
- PE(18:0/18:2)
- PE(18:1/20:3)
- PE(19:0/20:4)
- PE(20:0/20:4)
- PE(20:0/22:6)
- PE(20:1/22:6)
- PG(16:0/18:2)
- PG(18:1/20:4)
- PI(16:0/18:2)
- PI(18:0/18:2)
- PI(20:0/20:4)
- Cer [NS] (d18:1/23:1)
- Cer [NP] (t18:0/24:1)
- Cer [NS] (d18:2/22:0)
- Cer [NS] (d18:2/22:1)
- Cer [NS] (d18:2/24:2)
- Cer [NS] (d18:2/25:1)
- Cer [NS] (d18:2/26:1)
- FA 19:1
- FA 19:2
- FA 22:2
- FA 22:4
- HexCer [NS] (d18:2/16:0)
- lysoPC 20:1
- lysoPC 22:5
- PC(18:1/18:3)
- PC(18:1/22:1)
- PC(18:1/22:2)
- PE(16:0/18:0)
- PE(16:0/18:3)
- PE(18:1/22:2)
- PE(e16:1/16:0)
- PE(e16:1/17:1)
- PE(e18:1/18:0)
- PE(e18:1/20:1)
- PE(e18:1/22:2)
- PG(16:0/22:6)
- PG(22:5/22:6)
- PI(14:0/18:1)
- PI(16:0/18:0)
- PI(17:0/20:2)
- PI(17:1/18:1)
- PI(18:0/18:0)
- PI(18:0/22:2)
- PI(18:1/20:1)
- PI(18:1/20:2)
- PI(18:1/22:2)
- PS(16:0/20:4)
- PS(17:1/18:1)
- PS(18:0/20:5)
- PS(18:1/20:1)
- PS(18:1/22:1)
- PS(18:1/22:6)
- PS(22:0/18:1)
- SM(d18:0/16:0)
- SM(d18:0/24:1)
- SM(d18:1/22:1)
- HexCer [NS] (d18:1/14:0)
- FA 20:6
- PC(14:0/14:1)
- PC(14:0/15:0)
- PC(14:0/16:1)
- PC(14:0/20:5)
- PC(14:1/16:1)
- PC(15:0/16:1)
- PC(16:1/17:0)
- PC(16:1/18:2)
- PC(16:1/18:3)
- PC(18:1/20:2)
- PC(18:1/20:5)
- PE(14:0/16:0)
- PE(16:0/16:0)
- PE(16:0/17:1)
- PE(e16:1/18:3)
- PE(e18:1/20:3)
- PE(e18:1/20:5)
- PE(e18:1/22:4)
- PE(e18:1/22:5)
- PG(18:1/20:3)
- PI(16:0/14:1)
- PI(16:1/18:2)
- PI(17:0/16:1)
- PI(17:0/20:3)
- PI(18:0/20:5)
